# Supplementary material for: Linking Omics and Gene Editing Tools for Rapid Improvement of Traditional Food Plants for Diversified Foods and Sustainable Food Security
Source: Preprints.org preprint supplement (doi:10.20944/preprints202106.0363.v1), 2021-06-14
Supplement: Supplementary file 1 [file supplementary]

**Table S1. Diversity of some important traditional food crops grown across the globe and their nutritional and stress-resilient traits desirable for sustainable food security under climate change regimes.**

| **Sl. No.** | **Traditional food crop** | **Occurrence and traditional use** | **Important nutritional and stress resilient traits** |
| --- | --- | --- | --- |
| 1 | *Lolium perenne* (Perennial ryegrass; Poaceae) | Used as a cereal in North America, Southern countries of Europe, North Africa Middle East, and towards the eastern sides of Central Asia (Schnyder et al., 1990). | The seed has a nutritional value similar to oats (*Avena sativa*) and contains gluten which is an important trait of baked food (Schnyder et al., 1990). |
| 2 | *Cleome gynandra* (Stinkweed, Capparaceae) | It is an important vegetable in rural areas of several African countries (Mishra et al., 2011). | Plenty in linoleic acid. Rich in amino acids such as glutamic acid, aspartic acid, arginine, tyrosine, histidine and lysine (Mishra et al., 2011). C4 photosynthetic pathway helps them to survive in dry and hot conditions (Rao & Rajendrudu, 1989). Adapted to several types of soils and can grow in humid, semiarid and arid climates (Kumar et al., 1984). |
| 3 | *Basella alba* (Vine spinach, Basellaceae) | Used throughout the temperate regions and the tropics (Bamidele et al., 2010). | Leaves are rich in calcium, fibre, fat, protein and carbohydrates (Adhikari et al. 2012). They are extremely heat tolerant and are also adapted to a variety of soils and climates (Deshmukh & Gaikwad, 2014). |
| 4 | *Vigna subterranea* (Bambara groundnut, Fabaceae) | It has been an important indegenous crop in African countries such as Sahara, South Africa, Senegal, Kenya and Madagascar (Murevanhema and Jideani, 2013). | Drought and pest resistant, able to survive in poor soils. Rich in protein whereas fat content is less (Adebowale et al., [2002](https://www.tandfonline.com/doi/full/10.1080/10408398.2011.574803?casa_token=3QaPEKppwX8AAAAA%3AhYx-CO1Sa6gqn2v9isrJB7zoHfjJHy8d6IT4gbbk9TrXyG95E20R2syhwXkGrGHM_HdH2aviidbm5IRk)). Rich in essential sulfur containing amino acids such as Methionine and provides a good amount of fibre, iron, potassium, and calcium (Omoikhoje, [2008](https://www.tandfonline.com/doi/full/10.1080/10408398.2011.574803?casa_token=3QaPEKppwX8AAAAA%3AhYx-CO1Sa6gqn2v9isrJB7zoHfjJHy8d6IT4gbbk9TrXyG95E20R2syhwXkGrGHM_HdH2aviidbm5IRk)). |
| 5 | *Chlorophytum comosum* (spider plant, Asparagaceae) | Iran (Aberoumand et al., 2009). | Tubers are rich in carbohydrates, fibre and calcium (Aberoumand et al., 2009). |
| 6 | *Corchorus* spp. (Mallow, Malvaceae) | In India, Africa, and the Middle East, it has been a popular vegetable since ancient times (Schippers, 2000). It is also famous in some Arab countries such as Syria, Jordan and Egypt (Islam, 2013). | The leaves are a good source of calcium, iron, beta carotene, vitamin C, and α-tocopherol. Plant show antioxidant activity also (Islam, 2013). |
| 7 | *Macrotyloma uniflorum* (Horse gram, Fabaceae) | Cultivated in Asian countries specially India to Myanmar and African countries (Bhartiya et al., 2015). | Adapted to drought and poor fertile solid conditions. A potential source of nutrients such as protein. Iron and calcium (Bhartiya et al., 2015). |
| 8 | *Fagopyrum tataricum*, *F. esculentum* (Buckwheat, Polygonaceae) | Found on a large scale in Asian and Southeast Asian countries. It was spread from China to Japan and Korea, It is also consumed in Russia, Sweden, Europe and North America (Campbell, 1997). | Proteins are rich in essential amino acid lysine (Campbell, 1997). |
| 9 | *Brassica carinata* (Ethiopian mustard, Brassicaceae) | Consumed all over the world and are considered important food crops in European countries, India, Japan, and China (Cartea et al., 2011). It is an important green leafy vegetable in Zambia and in most parts of tropical Africa (Grubben, 1977). | They have high levels of glutamic acid, arginine and proline (Cartea et al., 2011). |
| 10 | *Colocasia esculenta* (Taro, Araceae) | It is found all over the Pacific islands and other parts of the world. Africa is the bulk producer of taro, followed by Asia and Oceania (Temesgen & Retta, 2015). | Rich in small starch grains and proteins. Nutritive than other tubers and rich in vitamins (thiamine, vitamin C, niacin and riboflavin), minerals (iron, phosphorus and calcium). Taro corms have a high quantity of magnesium and potassium. Also a good source of carotene (Kaushal et al., 2015). |
| 11 | *Boscia senegalensis*  (Aizen plant, Capparaceae) | Native to Sahel region of Africa (Habou et al., 2014). | Protein contains a considerable quantity of tryptophan and arginine. Zinc and iron present at a relatively high level (Kim et al., 1997). High degree of drought resistance (FAO/WHO, 1988). It can perform very well even in poorer land conditions (Habou et al., 2014). |
| 12 | *Sphenostylis stenocarpa*  (African yam bean, Fabaceae ) | Cultivated in the different regions of African countries (Daniel & Celestina, 2013). | The legume and tuber of the plant is edible. Adapted to wide range of climatic, geographical, and edaphic conditions  (Daniel and Celestina, 2013). They have a short growing period (Adegboyega et al., 2020). |
| 13 | *Telfairia occidentalis* (Fluted guard, Cucurbitaceae) | The crop is extensively cultivated in southern Nigeria (Okoli and Mgbeogu, 1983). | Leafy vegetable with oil rich leaves. Its nutritious seeds are also consumed as they are a good source of minerals and proteins (Okoli and Mgbeogu, 1983) |
| 14 | *Digitaria exilis*  (Fonio millet, Poaceae) | Cultivated throughout West Africa (Glew et al., 2013). | Rich in minerals, vitamins, carbohydrate, protein, fibre. It is rich in iron. Another advantage is that it is gluten free (Istifanus & Agbo, 2016). Grows in poor fertile soil and rain deficient areas ([Jideani, 1999](https://www.ncbi.nlm.nih.gov/pmc/articles/PMC4666555/#R30). Long storage life without preservatives (Glew et al., 2013). |
| 15 | *Crotalaria brevidens* (Rattle pod, fabaceae) | Widely consumed and cultivated in East Africa and West Africa  (Abukutsa-Onyango, 2016). | Good source of β-carotene, ascorbate, folic acid, riboflavin, iron, calcium and magnesium (Maundu et al., 1999; Abukutsa-Onyango, 2003). They have nitrogen fixing capacity, drought tolerance, produce seeds under tropical conditions and suitable for intercropping (Abukutsa-Onyango, 2004). |
| 16 | *Dacryodes edulis*  (African pear, Burseraceae) | Cultivated in Guinea and widely in other tropical parts of Africa (Ajibesin, 2011). | Edible fruits contain lipid, protein, vitamin and minerals such as potassium, calcium, magnesium, iron, zinc, copper and selenium (Ajibesin, 2011; Stadlmayr et al., 2012; Ene-Obong et al., 2019). |
| 17 | *Treculia africana* (African breadfruit, Moraceae) | Cultivated in Nigeria and Africa as a whole (Nuga & Ofodile, 2010). | Seeds are highly nutritious because of the presence of minerals such as potassium, magnesium and calcium, vitamins, fats, proteins, and carbohydrates (Okafor and Okolo, 1974). Grows in marginal areas where other species may not be able to grow (Nuga & Ofodile, 2010). |
| 18 | *Momordica balsamina* (Balsam apple, Cucurbitaceae) | Indegenous to the countries of tropical Africa, Arabia, Asia and Australia. Widely distributed in Swaziland Namibia, Botswana and the provinces of SouthAfrica (Thakur et al., 2009). | Leaves are rich in protein and fat. They have higher values of minerals such as calcium, magnesium and iron (Flyman & Afolayan, 2007). Leaves also contain 17 amino acids (Thakur et al., 2009). |
| 19 | *Adansonia digitata* (Baobab, Malvaceae) | Distributed throughout the drier parts of Africa, Namibia, Ethiopia, Sudan and Sahara (Gebauer et al., 2002). | Contains vitamin B2/Riboflavin, calcium, phosphorus, iron, vitamin A and vitamin C. It contains almost 10 times more vitamin C than oranges (Sididbe et al., 1998; Yazzie et al., 1994).  It is drought tolerant and can tolerate various ranges of pH. It can also grow in calcareous soils and rocky hillsides (Gebauer et al., 2002). |
| 20 | *Berchemia discolour* (Bird plum, Rhamnaceae) | Indigenous Southern African fruit tree species.  Widely distributed in the regions of northern, eastern, central and southern Africa (Lusepani, 1999). | The dry pulp is a rich source of calcium, carbohydrates, iron, sodium, potassium, and magnesium (Lusepani, 1999). |
| 21 | *Heinsia crinita* (Bush apple, Rubiaceae) | Indigenous to West Africa, especially the southern part of Nigeria (Udosen et al., 1999). | Rich in calcium, magnesium, potassium, iron and zinc (Udosen et al., 1999). |
| 22 | *Psophocarpus tetragonolobus* **(**Winged beans, fabaceae) | Widely grows in Malaysia, Indonesia, the Philippines, Bangladesh, Thailand, Sri Lanka, India, Myanmar and African countries (Lepcha et al., 2017). | Seeds, pods, tubers, foliage and flowers are nutritious (Lepcha et al., 2017) and contain higher crude protein (Amoo et al., 2006). It has adequate quantity of minerals such as P, K, Ca, S, Na, Mg, Mn, Fe, B, Sr, Zn, Ba, Cu and Cr, and vitamins such as vitamin A, vitamin B1, vitamin B2, vitamin B3, vitamin B6, vitamin B9, vitamin C and vitamin E (Misra et al., 1987).  It is suitable to be grown in hot, humid conditions and possess nitrogen fixation capacity (Jaffe & Korte, 1976). |
| 23 | *Tropaeolum tuberosum* (Mashua, Tropaeolaceae) | Traditional subsistence tuber crops indigenous to the Andean highlands (Ticona et al., 2020). | It can be grown in poor soils without pesticides and fertilizers (Ticona et al., 2020). They have a high level of protein with an ideal balance of essential amino acids. More content of vitamin C and provitamin A (equivalents of Retinol) than other Andean tubers. Magnesium, phosphorus, iron, and zinc rich (Altamirano, 1996). |
| 24 | *Oxalis tuberosa* (Oca, Oxalidaceae) | Second important tuber crop in Bolivia and Peru. Cultivated as an important crop in Central Andes, Chile, Argentina, Ecuador, Bolivia and Peru (Jimenez et al., 2015). | Iron and calcium rich tubers (Flores et al., 2003). Notable quantity of fructo-oligosaccharides reported (Jimenez & Sammán, 2014). |
| 25 | *Smallanthus sonchifolius* (Yacon Asteraceae) | Cultivated in Bolívia, Peru, Czech Republic, Argentina, Italy, Brazil, Ecuador, Korea, Japan, New Zealand, and the United States (Ojansivu et al., 2011). | Rich in fructooligosaccharides that are good for colon health. They are extremely hardy plants and adapted to cold and hot conditions (Lachman et al., 2003). |
| 26 | *Chenopodium pallidicaule* (Cañiwa, Amaranthaceae) | Majorly grown in Bolivian and Peruvian *altiplano* (Repo-Carrasco-Valencia et al., 2009)*.* | Exceptional protein quantity and quality and grains are enriched with micronutrients such as calcium and iron (Repo-Carrasco-Valencia et al., 2009). The nutritional value is equivalent to milk proteins (White et al., 1955). Gross et al. (1989) recognised that it has a balanced amino acid composition and 15.3% protein content. It doesn't have saponins, that gives bitter taste and hence it is possible to consume directly without washing. Drought and frost resistant plants, well adapted to rocky and poor nutrient soil..   (Repo-Carrasco-Valencia et al., 2009). |
| 27 | *Lablab purpureus* (Hyacinth bean, Fabaceae) | Third high priority vegetable in the south-western and central region of Bangladesh (Maass et al., 2020). Cultivated as a minor crop in tropical regions of Asia and Africa (Engle & Altoveris, 2000). | Extremely resilient to drought-prone areas. A good source of vegetable protein and also a potent source of fats,carbohydrates, fibers and minerals also (phosphorus, calcium, iron) (Naeem et al., 2020). |
| 28 | *Sclerocarya birrea* (Marula, Anacardiaceae( | African fruit tree (Mariod & Abdelwahab, 2012). | Seeds contain sufficient amounts of calcium, phosphorus, magnesium, iron, potassium, and copper. Seed edible part has 36.4% of protein, with high levels of cysteine and methionine. Fruits are rich in ascorbic acid and juice extracts contain 33 types of sesquiterpene hydrocarbons (Mariod & Abdelwahab, 2012). |
| 29 | *Amorphophallus paeoniifolius* (Elephant foot yam, Araceae) | Cultivated in Southeast Asian countries such as Malasia, Philippines and Indonesia. (Behera et al., 2014). | Multiple edible parts such as leaves, rhizome, and petioles. Immunity booster and rich in carbohydrates, phenols, alkaloids, tannins, flavones, steroids, coumarins, vitamins, minerals, and antioxidants (Tripathi et al., 2010; Behera et al., 2014). |
| 30 | *Solanum quitoense* (Lulo, Solanaceae) | Majorly cultivated and consumed in Columbia, Ecuador and Central America (Acosta et al., 2009). | Carotenoid content of fruit is high. Very low fat content but rich in proteins ( Acosta et al., 2009). |
| 31 | *Senna tora* (Sickle pod, Caesalpiniaceae) | India (Kubmarawa et al.,2011) | Its leaves consist of lipids, crude fibre, crude protein, mineralas (iron, calcium, cobalt sodium, zinc, magnesium, manganese, and potassium) (Kubmarawa et al.,2011). Sickle pods hold great potential as a source of medicine, minerals. They exhibit drought tolerance  (Shukla et al., 2013). |
| 32 | *Ziziphus jujuba* (Buckthorns, Rhamnaceae) | Widely distributed in Europe, Southern and Eastern Asia, and Australia. China is the only country known to be exporting jujube fruits (Li et al., 2007). | They  grow in different soils and are resistant to alkalinity and salinity, and better adapted to arid regions. They contain high amounts of fructose and fibre. Jujube fruit is rich in unsaturated fatty acids. Fruits are rich in lipids, especially linoleic acid (omega-6). They are rich in vitamin C also. Excellent source of magnesium, phosphorus, potassium, sodium, and zinc (Li et al., 2007; Guil-Guerrero et al., 2004). |
| 33 | *Pyrus pyrifolia* (Asian pear, Rosaceae) | It is cultivated throughout Central and South China, Russia, Korea, Japan, Vietnam, Thailand and India, Indonesia and Philippines. Recently, it is also cultivated in Australia, New Zealand and USA and Europe (Italy, France) (Lim, 2012). | Abundant vitamin B and minerals (Lim, 2012). |
| 34 | *Sclerocarya birrea* (Marula, Anacardiaceae) | Western Africa (Glew et al., 2004). | Rich in linoleic acid and oleic acid. Highest quantities of arginine than any other plant protein. zinc, magnesium and copper are comparatively higher (Glew et al., 2004). |
| 35 | *Setaria italica* (Foxtail millet, Poaceae) | China, India and other Asian countries (Shen et al., 2015) | Great tolerance to drought and can grow in arid and barren lands (Shen et al., 2015). |
| 36 | *Grewia asiatica* (Phalsa, Malvaceae) | Tropical and sub-tropical parts of South Asia including Cambodia, 58 Luzon region of the Philippines, Laos, northern  (Yadav, 1999). | Low in calories and fat, and high in vitamin A, vitamin C, minerals, and fiber. Gives better yields under limited water conditions with temperatures ranging between 35 degree Celsius to 45 degree celsius (Khan et al., 2019). |
| 37 | *Aegle marmelos* (Bael, Rutaceae) | Cultivated throughout India (Bhardwaj, 2014). | Potent source of vitamins (A, B, C, folate) and minerals, antioxidants, dietary fibre, amino acids and bioactive compounds (Bhardwaj, 2014). They are adapted to high salinity conditions  (Singh et al., 2018). |
| 38 | *Carissa carandas* (Koranda, Apocynaceae) | India (Jayakumar &  Muthuraman, 2018). | Rich source of vitamin C, iron, calcium and phosphorus (Jayakumar &  Muthuraman, 2018). They are xerophytic and suitable for growing in dry land (Dalal et al., 2010). |
| 39 | *Artocarpus heterophyllus* (Jackfruit, Moraceae) | Majorly cultivated in tropical regions of Burma, Sri Lanka, Indonesia, Malaysia, Jamaica, India, Mauritius, Brazil, East Africa, the Seychelles, and Rodrigues Island (Rodrigues et al., 2010). | Fruits are rich in carbohydrate and vitamins (A & C) and folic acid. Rich in calcium and magnesium (Ranasinghe et al., 2019). Tolerant to water deficit conditions  (Rodrigues et al., 2010). |
| 40 | *Ullucus tuberosus* (Olluco, Basellaceae) | Peru, Ecuador, Colombia, Venezuela and northwestern Argentina (Busch et al., 2000). | Frost and drought‐resistant and  gives good yield in poor soils. Lower in fat than corn (Busch et al., 2000). |
| 41 | *Arracacia xanthorrhiza* (Arracacha, Apiaceae) | It is found in South American Countries such as Ecuador, Colombia, Brazil, and Venezuela (Lim, 2014). | Adapted to mesothermic, montane, day length regimes and tropical frost-free conditions (Lim, 2014). |
| 42 | *Morinda citrifolia;*  *(*Indian mulberry; Rubiaceae) | Native to Southeast Asia and Australia and widely distributed globally (Nelson, 2003). | Vitamins such as ascorbic acid and provitamin A, amino acids such as aspartic acid, mineral and an alkaloid,  xeronine  is detected in its fruits (Chan-Blanco etal., 2006).  The plant shows tolerance to a number of stresses such as drought, water logging and salinity (Nelson, 2003). |
| 43 | *Canavalia gladiata*  (Sword bean; Leguminosae) | They are cultivated on a limited scale in Asia, West Indies, Africa and South America (Ekanayake et al.,2000). | Seed coat of the sword bean is rich in gallic acid and other derivatives (Popoola et al., 2019). Seeds are a rich source of sodium, potassium and calcium (Mohan and Janardhanan, 1994). The crude protein content of sword beans is high. Some cultivars are fairly resistant to drought (Ekanayake et al.*,* 2000). |
| 44 | *Lupinus mutabilis*  (Tarwi; Leguminosae) | Distributed widely in the Andes, Venezuela, Colombia, Ecuador, Peru and Bolivia, Australia, Germany, New Zealand, Poland and the United Kingdom (Eastwood & Hughes, 2018). | Seeds have high protein and lipid, content whereas fiber and carbohydrate content is lower as compared to other lupin species (Carvajal-Larenas et al., 2016). It has adaptability to temperate and cold climates. It can grow on marginal land and low fertility soils ([Gulisano](https://www.ncbi.nlm.nih.gov/pubmed/?term=Gulisano%20A%5BAuthor%5D&cauthor=true&cauthor_uid=31737013) etal.*,* 2019). |
| 45 | *Limonia acidissima* (Wood Apple; Rutaceae) | Native to India but also cultivated in Bangladesh, Pakistan and Srilanka (Vijayvargia & Vijayvergia, 2014) | The fruits are rich in β-carotene, vitamin B, vitamin C, thiamin and riboflavin. Fruit pulp is enriched with citric acid, other fruit acids, mucilage and minerals. Other compounds such as alkaloids, coumarins, fatty acids and sterols are also detected in its fruits (Vijayvargia and Vijayvergia, 2014). It is well adapted to drier conditions thus shows a greater stress tolerance (Ratnayake et al., 2020.). |
| 46 | *Cordia myxa*  (Indian Cherry:  Boraginaceae) | It is found globally especially in the tropics. It grows naturally in India, Myanmar and Afghanistan (Meghwal & Singh, 2015). | Fruits contain good quantities of sodium, potassium and protein (Aberoumand, 2011). It display drought tolerance and because of that it can easily grow in arid and semi-arid regions (Meghwal & Singh, 2015). |
| 47 | *Carissa carandas*  (Karonda; Apocyanaceae) | The plant is distributed in various parts of the world such as Nepal, Afghanistan, India, Sri Lanka, Java, Malaysia, Myanmar, Pakistan, Australia, and South Africa (Singh & Uppal, 2015). | Fruits are rich in calcium, iron, vitamin C, vitamin A (Arif et al., 2016). The plant shows drought tolerance (Singh & Uppal, 2015). |
| 48 | *Lepidium meyenii* (Maca, Brassicaceae) | Nutritionally highly valuable and is native to Peru (Muhammad et al.*,* 2002). | It contains good quantities of fiber, essential amino acids, fatty acids, vitamin C and minerals such as copper, iron, and calcium (Peres et al., 2020). |
| 49 | *Pastinaca sativa* (Parsnips, Apiaceae) | It is commonly found in old fields, roadsides and woodland edges in North America (Lim, 2015). | Rich in vitamins and minerals particularly rich in potassium (Lim, 2015). It shows drought tolerance (Tutin, 1980). |
| 50 | *Xanthosoma sagittifolium* (American taro, Araceae) | Traditionally used tuber crop, native to Nigeria and tropical Africa (Adebowale & Lawal, 2002). | Good source of carbohydrates and starch. Superior nutritional in terms of their protein digestibility and mineral composition such as calcium, phosphorus and magnesium) (Chukwu et al., 2018). |
| 51 | *Colocasia antiquorum* (Taro, Araceae) | Widely consumed throughout the world especially Africa, Asia, the West Indies, and South America (Miller, 1971). | The corms are rich in anthocyanins such as cyanidin-3-glucoside, pelargonidin-3-glucoside and cyanidin-3-rhamnoside (Miller, 1971). They are salt tolerant (Nyman et al., 1983). |
| 52 | *Nelumbo nucifera* (Lotus, Nymphaeaceae) | Creeping rhizome found throughout India. Also found in China and Japan (Rai etal*.,* 2006). | Seed is a good source of protein and total carbohydrate and possesses high calorific value. It also contains higher quantities of essential minerals such as Na, K, Mg, Fe, Co, Zn and P (Shad et al., 2013). They exhibit flooding tolerance (Nohara & Kimura, 1997). |
| 53 | *Plectranthus rotundifolius* (Spreng, Lamiaceae) | Eaten for its edible tubers, native to tropical Africa.Grown in Africa and SouthEast Asia (Manikandan et al., 2016). | It contains higher mineral content as compared to potato, sweet potato and cassava (Sethuraman et al., 2020). Highly tolerant to drought (Priya & Anbuselvi, 2013). |
| 54 | *Triticum monococcum* (Einkorn wheat, Poaceae) | It is an ancient staple food crop for many years. However, it is presently cultivated only in the Mediterranean region and continental Europe (Hidalgo & Brandolini, 2013). | Not very good in dietary fiber but it contains good amounts of proteins, unsaturated fatty acids, zinc and iron. It contains antioxidant compounds such as carotenoids, tocols and conjugated polyphenols, (Hidalgo and Brandolini, 2013). They exhibit salinity and frost tolerance (Prazak 2001). |
| 55 | *Triticum dicoccon* (Emmer wheat, poaceae) | Used as cereal crop in Middle- East, Central and West Asia, and Europe (Dhanavath & Rao, 2017). | Rich in proteins, carbohydrates, minerals, and poor in fats (Dhanavath & Rao, 2017). Shows drought tolerance (Nouri et al., 2011). |
| 56 | *T. spelta* (Dinkel wheat, Poaceae) | It has been an important staple food in parts of Europe in the ancient past (Kohajdova & Karovicova, 2008). | High vitamin content (Kohajdova & Karovicova, 2008) and rich source of iron, zinc, copper, magnesium, potassium, sodium and selenium (Ruibal-Mendieta et al., 2005). They have high flooding tolerance (Burgos et al., 2001). |
| 57 | *Eleusine coracana* (Finger millet, Poaceae) | It is produced in India, Niger, Mali, Burkina Faso, Chad and China (Chandra et al., 2016). | It is rich in calcium, dietary fibre, phylates, protein, minerals, and phenolics. It is also a rich source of vitamins such as thiamine and riboflavin. It contains a good quantity of iron, methionine, isoleucine, leucine, phenylalanine and other essential amino acids (Chandra et al., 2016). They are tolerant to drought, pests and pathogens (Hittalmani et al., 2017). |
| 58 | *Panicum sumatrense* (Little millet, poaceae) | Found in the [Caucasus](https://en.wikipedia.org/wiki/Caucasus), [China](https://en.wikipedia.org/wiki/China), [India](https://en.wikipedia.org/wiki/India) and [Malaysia](https://en.wikipedia.org/wiki/Malaysia) (Devi et al., 2011). | Rich in micronutrients such as calcium and iron. They also contain high dietary fibre content, essential amino acids, and have low glycaemic index (Devi et al., 2011). It also shows considerable tolerance against drought, salinity stresses and diseases. |
| 59 | *Panicum miliaceum* (Proso millet, poaceae) | Produced in China, Russia, India and some countries of Eastern Europe and North America (Kalinova. 2007). | The protein content is richer in essential amino acids such as leucine, isoleucine, and methionine than wheat (Kalinova & Moundry, 2006). They are drought tolerant (Zhang et al., 2019). |
| 60 | *Pennisetum glaucum* (Pearl millet, poaceae) | Pearl millet is an important cereal and it is well adapted to arid and semiarid regions of Asia and Africa (Jukanti et al., (2016). | It has high levels of calcium, iron, zinc, lipids and amino acids such as lysine, tryptophan, threonine and fatty acids such as omega-9, omega-6 and omega-3. The tannins and phytates act as strong antioxidants (Sade, 2009; Onyango et al., 2013). It has a low glycemic index and it is gluten free crop. They are extremely drought tolerant crops (Newman et al., 2010). |
| 61 | *Brosimum alicastrum* (Breadnut, Moraceae) | Grown in southern Mexico (Rzedowski, 1978). | The flour obtained from the seeds is characterized by high protein, dietary fiber and micronutrient content. They are drought tolerant (Cueto et al., 2019). |
| 62 | *Artocarpus altilis* (Breadfruit, Moraceae) | It is an important food in the Pacific (Taylor & Tuia, 2007). | Rich in fibre, protein, magnesium, potassium, phosphorus, thiamine (B1), and niacin (B3). They have tolerance to salinity and can grow on coralline soils and atolls (Tukura & Obliva, 2015). |
| 63 | *Artocarpus heterophyllus* (Jackfruit, moraceae) | Widely grown in Bangladesh, Malaysia, Burma, Sri Lanka, Indonesia, Philippines, Caribbean islands, West Africa, Australia, some parts of USA and Brazil (Narasimham, 1990). | Jackfruit is rich in health beneficial compounds such as carotenoids, flavonoids, volatile acids, sterols and tannins (Chandrika et al., 2004; Arung et al., 2007). It is rich in fibre, sugars, minerals such as calcium, magnesium, phosphorus, potassium, sodium, iron and vitamins such as vitamin A, thiamine, riboflavin, vitamin C (Ranasinghe et al., 2018). |
| 64 | *Pachira aquatica*  (Malabar Chestnut; Bombacaceae) | Native to Southern Mexico, Guyana and Northeastern Brazil and introduced in other areas such as Guangdong, Southern Yunnan, and Taiwan as a cultivated plant (Rodrigues et al., 2019). | Seeds contain a high amount of lipids, proteins with high amounts of essential amino acids such as tryptophan, threonine and phenylalanine/tyrosine (Oliveira et al., 2000). Seeds contain more phosphate, magnesium, zinc, iron and copper than some fruits and other starchy foods (Rodrigues et al., 2019). |
| 65 | *Strychnos cocculoides*  (Monkey orange; Loganiaceae) | The species is native to Botswana, Kenya, Namibia, South Africa, Tanzania, Uganda, Zambia, Zimbabwe (Orwa et al., 2009). | Adapted to drought prone and semi-arid areas. The vitamin C content of the fruits varies from 34.2 mg/100 g to 88 mg/100 g. Considered an essential source of iron (Ngadze et al., 2017). |

**Table S2: Major domestication traits and the genes governing them in important crop plants (Modified from Meyer** and **Purugganan, 2013).**

| **Domesticated crop**| **related traditional crop (s)** | **Gene** | **Wild trait** | **Domestication trait** | **Function of the gene** | **Reference (s)** |
| --- | --- | --- | --- | --- | --- |
| *Fragaria vesca* | *Pyrus pyrifolia, Rubus fruticosus, R. spectabilis, R. occidentalis* (Soundararajan et al., 2019) | *TERMINAL FLOWER 1 Homologue KSN* (*TFL1*) | Non-frequent flowering. | Continuous flowering. | Flowering repression. Establishment of continuous flowering habit. | [Iwata et al., 2012](https://www.cell.com/molecular-plant/fulltext/S1674-2052(15)00094-5); [Koskela et al., 2012](https://www.cell.com/molecular-plant/fulltext/S1674-2052(15)00094-5); Meyer & Purugganan, 2013 |
| *Hordeum vulgare | Hordeum murinum* (Ferchichi et al., 2018), [*Hordeum brachyantherum*](http://www.ncbi.nlm.nih.gov/Taxonomy/Browser/wwwtax.cgi?mode=Tree&id=52712&lvl=3&lin=f&keep=1&srchmode=1&unlock), [*Hordeum jubatum*](http://www.ncbi.nlm.nih.gov/Taxonomy/Browser/wwwtax.cgi?mode=Tree&id=4517&lvl=3&lin=f&keep=1&srchmode=1&unlock) (von Bothmer et al., 1995) | *nud* (*nud*) | Palea and lemma hulls are tightly adhered to the caryopsis which results in hulled seeds. | Reduced organ adhesion between the caryopsis and the hull. | Controls caryopsis and is involved in the lipid biosynthesis pathway. | Yu et al., 2016; Meyer & Purugganan, 2013 |
| *SIX-ROWED SPIKE*  *1* (*VRS1*) | Two rawed inflorescence. | Change of inflorescence architecture from two-rowed to six-rowed spikelet. | Loss of function of Vrs1 results in the conversion of the rudimentary lateral two-rowed spikelet in barley into a fully developed six rowed fertile spikelet. | Meyer & Purugganan, 2013; Komatsuda et al., 2007 |
| *Photoperiod-H1* (*Ppd-H1*) | Early flowering. | Delayed flowering time. | Candidate gene for leaf size and flowering time in the barley population. | Meyer & Purugganan, 2013; Digel et al., 2016 |
| *RESISTANT TO RALSTONIA SOLANACEARUM 2* (*RRS2*) | Low leaf scald resistance. | Increased leaf scald resistance. | Resistance gene to fungal pathogen *Rhynchosporium secalis* which causes leaf scald disease. | Meyer & Purugganan, 2013; Genger et al., 2003 |
| *EARLY FLOWERING3* (*ELF3*) | Late flowering. | Earlier flowering time. | Part of a circadian clock input pathway. Can regulate the initiation of flowering independently of phyB. | Meyer & Purugganan, 2013; Herrero et al., 2012 |
| *INTERMEDIUM-C* (*INT-C*) | Tillering and sterile lateral spikelet. | Increased expression causes suppression of tillering and male fertility in lateral spikelets. | R[egulation of shoot system development](https://www.ebi.ac.uk/QuickGO/term/GO:0048831). Mutation of the gene is correlated with lateral spikelet fertility phenotypes. | Meyer & Purugganan, 2013; Ramsay et al., 2011; Ramsay et al., 2011. |
| *Oryza sativa | Oryza latifolia*, *Oryza glumaepatula* (Bortolotto et al., 2015) | *PROSTRATE GROWTH1* (*PROG1*) | Prostrate growth. | Asymmetrical growth of tiller base leading to erect growth. | Inactive prog1 results in the conversion of prostrate to erect growth habit in domesticated rice. | Meyer & Purugganan, 2013; Tan et al., 2008 |
| *SHATTERING4-1* (*SH4-1*) | Easily shattering seeds. | Lack of an abscission layer leads to seed non-shattering. | Responsible for rice grain shattering. | Meyer & Purugganan, 2013; Li et al., 2006; [Lin et al., 2007](https://www.ncbi.nlm.nih.gov/pmc/articles/PMC2759215/#MCM224C40) |
| *BLACK HULL4* (*BH4*) | Black hull. | White hull. | Controls black hull color. | Meyer & Purugganan, 2013; Zhu et al., 2011 |
| *Red pericarp* (*Rc*) | Red pericarp. | White pericarp (absence of anthocyanin). | Required for red pericarp in rice- proanthocyanin synthesis related gene. | Meyer & Purugganan, 2013; Sweeney et al., 2006 |
| *AMMONIUM TRANSPORTER1;1* (*AMT1;1*) | Poor nitrogen uptake mechanism. | Modified nitrogen uptake and response. | It is a high affinity ammonium transporter which may be involved in ammonium uptake from the soil. | Meyer & Purugganan, 2013; Filiz and Akbudak, 2020. |
| *LIGULELESS1* (*LG1*) | Open the panicle and easily shatter seeds. | Altered panicle growth results in closed panicles and reduced shattering. | Controls laminar joint formation between leaf blade and leaf sheath and controls ligule and auricle development. | Meyer & Purugganan, 2013; Lee et al., 2007 |
| *BETAINE ALDEHYDE DEHYDROGENASE2* (*BADH2*) | Non fragrant grains. | Fragrant grains. | Plays a key role in the accumulation of a fragrant compound, 2-acetyl-1-pyrroline (2AP). An inactive BADH2 promotes fragrance in rice. | Meyer & Purugganan, 2013; Baicharoen et al., 2018 |
| *GRAIN WIDTH5* (*GW5/SW5)*) | Small sized seeds. | Increase seed size by increasing cell number of outer glume layer. | Controls rice grain width and weight | Meyer & Purugganan, 2013; Weng et al., 2008 |
| *GRANULE BOUND STARCH SYNTHASE I* (*Waxy*; *GBSSI)* | Non glutinous grains. | Glutinous grains. | It controls amylose synthesis in endosperm. | Meyer & Purugganan, 2013;  Merida et al., 1999; Han et al., 2019. |
| *GRAIN SIZE3* (*GS3*) | Short grain. | Long grain phenotype. | Contributes to seed or grain size. | Meyer & Purugganan, 2013; Takano-Kai et al., 2009 |
| *SHATTERING1* (*Sh1*) | Shattering. | Reduction in shattering. | Controls shattering. | Meyer & Purugganan, 2013;; [Li et al., 2006](https://www.ncbi.nlm.nih.gov/pmc/articles/PMC2759215/#MCM224C39). |
| *HEADINGDATE1* (*HD1*) | Early flowering. | Delayed flowering time. | A regulator of the florigen gene Hd3a. | Meyer & Purugganan, 2013; Takahashi & Shimamoto, 2011 |
| *Quantitative trait locus of seed shattering on chromosome 1 (qSH1)* | Shattering seeds. | Loss of seed shattering because of the absence of abscission layer. | Regulates seed shattering. | [Konishi et al., 200](https://www.ncbi.nlm.nih.gov/pmc/articles/PMC2759215/#MCM224C38)6; [Li et al., 2006](https://www.ncbi.nlm.nih.gov/pmc/articles/PMC2759215/#MCM224C39). |
| *Zea mays | Setaria italica, Lolium perenne, Digitaria exilis, Avena sativa, Secale cereale* (Hulbert et al., 1990) | *teosinte glume architecture 1* (*Tga1*) | Hard glume. | Softer glume. | Repress the growth of lateral branches in length and numbers. | Meyer & Purugganan, 2013; Dorweiler and Doebley 1997; Doebley et al., 1995;  Wang et al., 2005; Wang et al., 2015. |
| *zea agamous-like1* (*Zagl1*) | Small female ear. | Increase in female ear length. | Role in flowering time and ear size. | Meyer & Purugganan, 2013 |
| *ramosa1* (*ra1*) | Many branches with multiple ears on each branch and tassel at the tip of the branch. | Affects kernel organization, altered inflorescence architecture. | Regulate the inflorescence branching systems. | Meyer & Purugganan, 2013; Yang 2011 |
| *PROLAMIN BINDING FACTOR* (*PBF*) | Less storage protein. | Altered prolamin protein levels in seeds. | Controls the expression of seed storage protein (zein) genes. | Meyer & Purugganan, 2013; |
| *teosinte branched 1* (*TB1*) | Many branches with multiple ears on each branch and tassel at the tip of the branch. | Increased expression causes short, ear-tipped branches. | It is involved in apical dominance. It has a significant role in repression of axillary organs. | Meyer & Purugganan, 2013; Wang et al., 2015; Doebley et al., 1991; [Hubbard *et al.*, 2002](https://www.ncbi.nlm.nih.gov/pmc/articles/PMC2759215/#MCM224C34). |
| *SHATTERING1-5.1, SHATTERING1-5.2* (*Sh1-5.1-Sh1-5.2*) | Easily shattering. | Non-shattering phenotype because of lack of abscission layer. | Play a key role in establishment of the abscission layer and is responsible for grain shattering. | Meyer & Purugganan, 2013; Li et al., 2006. |
| *BARREN STALK1* (*BA1*) | Presence of axillary meristem. | Prevents axillary meristem development. | Modulates maize inflorescence. Also regulates vegetative lateral meristem. | Meyer & Purugganan, 2013; Gallavotti et al., 2004 |
| *CO, CO-LIKE, and TIMING OF CAB1* (*CCT*) | Late flowering. | Lower expression leads to earlier flowering. | *CO*, *CO-like* and *TIMING OF CAB1* modulate flowering time. | Meyer & Purugganan, 2013; Putterill et al., 1995; Li et al., 2017 |
| *MADS19* (*zmm19*) | Kernels without glume covering. | Ectopic expression in inflorescences leads to kernels covered by glumes. | Loss of the MADS19 results in larger glumes. | Meyer & Purugganan, 2013; Han et al., 2012 |
| *SUGARY1* (*Su1*) | Non sweety taste. | Altered starch biosynthesis, sugary sweet taste. | Key role in [starch biosynthetic process](https://www.ebi.ac.uk/QuickGO/term/GO:0019252) | Meyer & Purugganan, 20133; James et al., 1995; Dinges et al., 2001. |
| *SHATTERING1* (*Sh1*) | Shattering phenotype. | Non-shattering phenotype because of lack of abscission layer. | Promotes grain shattering through an abscission layer. | Meyer & Purugganan, 20133; Li et al., 2006 |
| *Glycine max | Canavalia ensiformis, Canavalia gladiata, Lupinus mutabilis, Cajanus cajan,  Phaseolus  mungo, Vigna unguiculata, Phaseolus vulgaris, Lens culinaris, Vicia faba, Phaseolus aconitifolius, P calcaratus, P lunatus, Lathyrus sativus , Cyamopsis tetragonolobus, Dolichos lablab, and Arachis hypogaea* (Smartt, 1990; Weeden, 2007) | *TERMINAL FLOWER1b* (*TFL1b*) | Indeterminate shoots. | Determinate shoots end with terminal inflorescence. | Maintains indeterminate growth of cells in the shoot apical meristem. | Meyer & Purugganan, 2013; Goretti et al., 2020 |
| *Setaria italica | Setaria faberi, S. viridis, S. pumila, Panicum glaucum, P. miliaceum* (wild foodshomegarden.com) | *GRANULE BOUND STARCH SYNTHASE I* (*GBSSI*) | Non-glutinous grains. | Glutinous grains. | The gene is involved in starch biosynthesis. | Meyer & Purugganan, 2013; Fukunaga et al., 2002; Fukunaga et al., 2002; Seung, 2020. |
| *Solanum lycopersicum | Solanum quitoense, Solanum macrocarpon, Physalis prunisa, Physalis minima* (Mueller et al., 2005; Lemmon et a;. 2018) | *FASCIATED* (*FAS*) | Small fruit size. | Increased cell proliferation leads to larger fruit. | Promotes cell size growth. | Meyer & Purugganan, 2013; Rodríguez et al., 2011. |
| *fruit weight 2.2* (*FW2.2*) | Less number of locules. | Increase in locule number in fruit. | Regulates fruit size. | Meyer & Purugganan, 2013; Li et al., 2019; Paterson et al., 1988 |
| *OVATE* (*OVATE*) | Non expensed fruit neck region. | Expansion of fruit neck region. | Key regulator of fruit shape. | Meyer & Purugganan, 2013; Wang et al., 2016 |
| *SUN* (*SUN*) | Non elongated fruit. | Increased growth resulting in elongated fruit. | Major gene controlling the elongated fruit shape. | Meyer & Purugganan, 2013; Wu et al., 2011) |
| *LOCULE NUMBER* (*LC*) | Fruits having two locules. | Fruits have 3-4 locules instead of 2 locules. | Control fruit shape. | Meyer & Purugganan, 2013; Rodríguez et al., 2011 |
| *Vitis vinifera* | *Cissus discolor, Cayratia pedata, Cissus mollissima, Ampelocissus  latifolia* (Rossetto et al., 2001) | *myb-related transcription factor* (*MYBA1*) | Dark coloured berry. | Lack of anthocyanins lead to white berry color. | Controls the last steps in the anthocyanins biosynthesis pathway. | Meyer & Purugganan, 2013; Péros et al., 2015 |
| *myb-related transcription factor* (*MYBA2*) | Dark coloured berry. | Lack of anthocyanins lead to white berry color. | Control the anthocyanin biosynthesis pathway. | Meyer & Purugganan, 2013 |

**References**

Aberoumand, A. (2011). Determination  and comparison of nutritive values  and mineral  elements  of three important  food edible plants of southern Iran. *Croatian  Journal of Food  Technology,* *Biotechnology and Nutrition,* *6,* 148–151.

Aberoumand, A., & Deokule, S. S. (2009). Chemical analysis and nutritional value of Chlorophytum comosum: a plant food in Iran. *Journal of Medicinal Food Plants*, *1*, 87-91.

Abukutsa-Onyango, M. O. (2003). Unexploited potential of indigenous African indigenous vegetables in Western Kenya. *Maseno Journal of Education, Arts and Science, 4,* 103-122.

Abukutsa-Onyango, M. O. (2004). *Crotalaria brevidens* Benth. In G. J. H. Grubben, & O. A. Denton (Eds.), *Plant Resources of Tropical Africa 2 Vegetables* (pp.  229-231). Backhuys Publishers, Netherlands.

Abukutsa-Onyango, M. O. (2016). Response of slenderleaf (*Crotalaria brevidens* Benth) to inorganic nitrogen application. *Africal Journal of Food Agriculture and Development, 7,* 1-10.

Acosta, Ó., Pérez, A. M., Vaillant, F. (2009). Chemical characterization, antioxidant properties, and volatile constituents of naranjilla (*Solanum quitoense* Lam.) cultivated in Costa Rica. *Archivos latinoamericanos de nutrición, 59,* 88-94.

Adebowale, K. O., Afolabai, T. A., & Lawal, O. S. (2002). Isolation, chemical modification and physicochemical characterisation of bambara groundnut (*Voandzeia subterranean)* starch and flour. *Food Chemistry,* *78,* 305–311. <https://doi.org/10.1080/10408398.2011.574803>.

Adegboyega, T. T., Abberton, M. T., AbdelGadir, A. H., Dianda, M., Maziya-Dixon, B., Oyatomi, O. A., Ofodile, S., & Babalola, O. O. (2020). Evaluation of nutritional and antinutritional properties of African Yam Bean (*Sphenostylis stenocarpa* (Hochst ex. A. Rich.) Harms.) Seeds. *Journal of Food Quality*, *2020,* 1-11. <https://doi.org/10.1155/2020/6569420>.

Adhikari, R., Kumar, N., & Shruthi, S. D. (2012). A review on medicinal importance of *Basella alba* L. *International Journal of Pharmaceutical Science.*

Ajibesin, K. K. (2011). *Dacryodes edulis* (G. Don) H J Lam: a review on its medicinal, phytochemical and economical properties. *Research Journal of Medicinal Plant, 5*, 32-41. [https://doi.org/](https://doi.org/10.1186/s12870-019-1775-1)[10.3923/rjmp.2011.32.41](https://dx.doi.org/10.3923/rjmp.2011.32.41).

Akwaowo, E. U., Ndon, B. A., & Etuk, E. U. (2000). Minerals and antinutrients in fluted pumpkin *(Telfairia occidentalis* Hook f.)*. Food Chemistry, 70,* 235–240*.* <https://doi.org/10.1016/s0308-8146(99)00207-1>.

Altamirano, A. M. (1996). Estudio de la Variación Morfológica e Isoenzimatica de 78 entradas de Mashua (*Tropaeolum tuberosum* R & P.). In Universidad Central de Ecuador.

Amoo, I. A., Adebayo, O. T., & Oyeleye, A. O. (2006). Chemical evaluation of winged beans (*Psophocarpus tetragonolobus*), Pitanga cherries (*Eugina uniflora*) and orchid fruit (orchid fruit myristica). *African Journal of Food, Agriculture, Nutrition and Development,* *6,* 1–12.

Arif, M., Kamal, M., Jawaid, T., Khalid, M., Saini, K. S., Kumar, A., & Ahmad, M. (2016). *Carissa carandas* Linn. (Karonda): An exotic minor plant fruit with immense value in nutraceutical and pharmaceutical industries. *Asian Journal of Biomedical and Pharmaceutical Sciences*, *6,* 14-19.

Arung, E. T., Shimizu, K., Kondo, R. (2007). Structure- activity relationship of prenyl-substituted polyphenols from *Artocarpus heterophyllus* as inhibitors of melanin biosynthesis in cultured melanoma cells. *Chemistry and Biodiversity*, *9,*  2166-2171. <https://doi.org/10.1002/cbdv.200790173>.

Baicharoen, A., Vijayan, R., & Pongprayoon, P. (2018). Structural insights into betaine aldehyde dehydrogenase (BADH2) from *Oryza sativa* explored by modeling and simulations. *Scientific Reports, 8,* 1-7. <https://doi.org/10.1038/s41598-018-31204-z>.

Bamidele, O., Akinnuga, A. M., Olorunfemi, J. O., Odetolo, O. A., Oparaji, C. K., Ezelgbo, N. (2010). Effects of aqueous extract of *Basella alba* leaves on haematological and biochemical parameters in Albino rats. *African Journal of Biotechnology,* *9,* 6952-6955.

Behera, A., Kumar, S., & Jena, P. K. (2014). A Review on *Amorphophallus* species: Important medicinal wild food crops of Odisha. *International Journal of Pharmacy Life* *Science, 5,* 3512-3516.

Bhardwaj, R. L. (2014), “Role of bael fruit juice in nutritional security of Sirohi tribals”, Benchmark survey report of Sirohi Tribals, Krishi Vigyan Kendra, AU, Jodhpur.

Bhartiya, A., Aditya, J. P., & Kant, L. (2015). Nutritional and remedial potential of an underutilized food legume horsegram (Macrotyloma uniflorum): a review. *Journal of Animal and Plant Science*, *25*, 908-920.

Bortolotto, I. M., de Mello Amorozo, M. C., Neto, G. G., Oldeland, J., & Damasceno-Junior, G. A. (2015). Knowledge and use of wild edible plants in rural communities along Paraguay River, Pantanal, Brazil. *Journal of Ethnobiology and Ethnomedicine*, *11*,  1-14. <https://doi.org/10.1186/s13002-015-0026-2>.

Bosch, C. H. (2004). *Moringa Oleifera* Lam. In S. Walshaw (Ed.), *Plant Resources of Tropical Africa* *Vegetables,* Backhuys Publishers: Kerkwerve, The Netherlands.

Burgos, M. S., Messmer, M. M., Stamp, P., & Schmid, J. E. (2001). Flooding tolerance of spelt (Triticum spelta L.) compared to wheat (*Triticum aestivum* L.)–A physiological and genetic approach. *Euphytica*, *122*, 287-295. <https://doi.org/10.1023/A:1012945902299>.

Busch, J. M., Sangketkit, C., Savage, G. P., Martin, R. J., Halloy, S., & Deo, B. (2000). Nutritional analysis and sensory evaluation of ulluco (*Ullucus tuberosus* Loz) grown in New Zealand. *Journal of the Science of Food and Agriculture, 80,* 2232-2240. [https://doi.org/](https://doi.org/10.1186/s12870-019-1775-1)[10.1002/1097-0010(200012)80:15<2232::aid-jsfa785>3.0.co;2-n](https://doi.org/10.1002/1097-0010(200012)80:15%3C2232::aid-jsfa785%3E3.0.co;2-n).

Campbell, C. G. (1997). *Buckwheat Fagopyrum esculentum Moench*. International Plant Genetic resources Institute.

Cartea, M. E., Francisco, M., Soengas, P., & Velasco, P. (2011). Phenolic compounds in *Brassica* vegetables. *Molecules*, *16*, 251-280. <https://doi.org/10.3390/molecules16010251>.

Carvajal-Larenas, F. E., Linnemann, A. R., Nout, M. J. R., Koziol, M., Van Boekel, M. A. J. S. (2016). *Lupinus Mutabilis*: Composition, Uses, Toxicology, and Debittering. *Critical Reviews in Food Science and Nutrition*, *56,* 1454-1487. [https://doi.org/](https://doi.org/10.1023/A:1008119107738)10.1080/10408398.2013.772089.

Chan-Blanco, Y., Vaillant, F., Perez, A. M., Reynes, M., Brillouet, J., & Brat, P. (2006). The noni fruit (*Morinda citrifolia* L.): A review of agricultural research, nutritional and therapeutic properties. *Journal of Food Composition and Analysi*s, *19,* 645–654.

Chandra, D., Chandra, S., & Sharma, P. A. K. (2016). Review of Finger millet (*Eleusine coracana* (L.) Gaertn): A Power house of health benefiting nutrients. *Food Science and Human Wellness*, *5,* 149-155. <http://dx.doi.org/10.1016/j.fshw.2016.05.004>.

Chandrika, U. G., Janz, E. R.,& Warnasuriya, N. D. (2004). Analysis of carotenoids in ripe Jackfruit (*Artocarpus heterophyllus*) Kernel and Study of their bioconversion in rats. *Journal of the Science of Food and Agriculture*, *85,* 186-190.  <https://doi.org/10.1002/jsfa.1918>.

Chukwu, G. O., Ekwe, K. C., & Anyaeche, S. (2008). Cocoyam production and usage in Nigeria. National Root Crops Research Institute (NRCRI) News Bulletin.

Cueto, R. S., Saavedra, A. L., Vega, M. L. R., de la Rosa, L. A., Contreras, L. E. S., Martínez, M. G., Flores, A. A. V., García, J. R., Avitia, A. V. C., Gastélum, J. A. N., & Ruiz, N. R. M. (2019). *Brosimum alicastrum* Sw. (Ramón): An alternative to improve the nutritional properties and functional potential of the wheat flour Tortilla. *Foods*, *8,* 1-18.  [https://doi.org/](https://doi.org/10.1007/s12571-016-0557-y)10.3390/foods8120613.

Dinges, J.R., Colleoni, C., Myers, A.M., James, M.G. (2001). *Molecular structure of three mutations at the Maize sugary1 Locus and their allele-specific phenotypic effects. Plant physiology, 125,* 1406–1418*.* [https://doi.org/](https://doi.org/10.1007/s12571-016-0557-y)10.1104/pp.125.3.1406.

Dalal, R. P., Thakur, N. A., & Singh, A. (2010). Nutritional value of Karonda (*Carissa carandas* Linn). A non-conventional fruit under semi-arid condition of Punjab. *Indian Journal of Agroforestry*, *12*, 102-104.

Daniel, A. B., & Celestina, O. N. (2013). A review on genetic resources, diversity and agronomy of african yam bean (*Sphenostylis stenocarpa* (Hochst. Ex A. Rich.) Harms): A potential future food crop. *Sustainable Agriculture Research,*  *2,* 32-43. [https://doi.org](https://doi.org/10.1006/jfca.1996.0515)/[10.5539/sar.v2n1p32](https://www.researchgate.net/deref/http%3A%2F%2Fdx.doi.org%2F10.5539%2Fsar.v2n1p32).

Deshmukh, S. A., & Gaikwad, D. K. (2014). A review of the taxonomy, ethnobotany, phytochemistry and pharmacology of *Basella alba* (Basellaceae). *Journal of Applied Pharmaceutical Science,* *4,* 153-165. [https://doi.org/](https://doi.org/10.3390/app10124354)[10.7324/japs.2014.40125](https://doi.org/10.7324/japs.2014.40125).

Devi, P. B., Vijayabharathi, R., Sathyabama, S., Malleshi, N. G., & Priyadarisini, V. B. (2011). Health benefits of finger millet (*Eleusine coracana* L.) polyphenols and dietary fiber: a review. *Journal of Food Science and Technology*, *51,* 1021-1040. <https://doi.org/10.1007/s13197-011-0584>.

Dhanavath, S., & Rao, U. J. S. P. (2017).  Nutritional and nutraceutical properties of *Triticum dicoccum* wheat and its health benefits: An overview. *Journal of Food Science, 82,* 2243-2250. [https://doi.org/](https://doi.org/10.1002/jsfa.6382)10.1111/1750-3841.13844.

Digel, B., Tavakol, E., Verderio, G., Tondelli, A., Xu, X., Cattivelli, L., Rossini, L., & von Korff, M. (2016). Photoperiod-H1 (Ppd-H1) controls leaf size. *Plant Physiology*, *172*, 405-415. <https://doi.org/10.1104/pp.16.00977>.

Doebley, J., & Stec, A. (1991). Genetic analysis of the morphological differences between maize and teosinte. *Genetics*, *129*,  285-295.

Doebley, J., Stec, A., & Gustus, C. (1995). teosinte branched1 and the origin of maize: evidence for epistasis and the evolution of dominance. *Genetics*, *141*, 333-346.

Dorweiler, J. E., & Doebley, J. (1997). Developmental analysis of Teosinte glume architecture1 : a key locus in the evolution of maize *(Poaceae). American Journal of Botany, 84,* 1313–1322. https://doi.org/10.2307/2446130.

Eastwood, R. J., & Hughes, C. E. (2018).   Lupinus mutabilis. *Curtis’s Botanical Magazine*,  *35,* 134–148.

Ekanayake, S., Jansz, E. R., & Nair, B. M. (2000). Literature review of an underutilized legume: *Canavalia gladiata* L. *Plant Foods for Human Nutrition,* *55,* 305–321. <https://doi.org/10.1023/A:1008119107738>.

Ene-Obong, H., Igile, G., Ekpo, A., Egbung, E., & Agbo, M. (2019). Variations in the nutrients and bioactive compounds of different accessions of the West African pear (*Dacryodes edulis*): Implications for dietary intake assessment and health. *Journal of Food Composition and Analysis,* *79,* 80-86. [https://doi.org/](https://doi.org/10.1186/s12870-019-1775-1)[10.1016/j.jfca.2019.03.005](https://www.researchgate.net/deref/http%3A%2F%2Fdx.doi.org%2F10.1016%2Fj.jfca.2019.03.005).

Engle, L. M., Altoveris, N. C. (2000). “*Collection, Conservation and Utilization of Indigenous Vegetables.*” Asian vegetable research and development centre (AVRDC), Shanhua.

FAO/WHO 1988 Traditional Food Plants. FAO, Rome.

Ferchichi, S., Hessini, K., Dell’Aversana, E., D’Amelia, L., Woodrow, P., Ciarmiello, L.F., Fuggi, A., & Carillo, P. (2018). *Hordeum vulgare* and *Hordeum maritimum* respond to extended salinity stress displaying different temporal accumulation patterns of metabolites. *Functional Plant Biology*, *45,* 1096-1109. <https://doi.org/10.1071/FP18046>.

Filiz, E., & Akbudak, M.A. (2020). *Ammonium transporter 1 (AMT1) gene family in tomato (Solanum lycopersicum L.): Bioinformatics, physiological and expression analyses under drought and salt stresses. Genomics, 112,* 3773-3782. [https://doi.org/](https://doi.org/10.1006/jfca.1996.0515)10.1016/j.ygeno.2020.04.009

Flores, H. E., Walker, T. S.,  Guimaraes, R. L., Bais, H. P., & Vivanco, J. M. (2003). Andean root and tuber crops: Underground rainbows, *Horticultural Science, 38*, 161–167.

Flyman, M. V., & Afolayan, A. J. (2007). Proximate and mineral composition of the leaves of *Momordica balsamina* L.: an under-utilized wild vegetable in Botswana. *International Journal of Food Sciences and Nutrition, 58*, 419–423*.* [https://doi.org/](https://doi.org/10.1006/jfca.1996.0515)10.1080/09637480701253417.

Fuentes, F. F., Martinez, E. A., Hinrichsen, P. V., Jellen, E. N., & Maughan. P. J. (2009). Assessment of genetic diversity patterns in Chilean quinoa (*Chenopodium quinoa* Willd.) germplasm using multiplex fluorescent microsatellite markers. *Conservation Genetics, 10,* 369-377. <https://doi.org/10.1007/s10592-008-9604-3>.

Fukunaga, K., Kawase, M., & Kato, K. (2002). *Structural variation in the Waxy gene and differentiation in foxtail millet [Setaria italica (L.) P. Beauv.]: implications for multiple origins of the waxy phenotype. Molecular Genetics and Genomics, 268,* 214–222*.* [https://doi.org/](https://doi.org/10.1007/s10592-008-9604-3)10.1007/s00438-002-0728-8.

Gallavotti, A., Zhao, Q., Kyozuka, J., Meeley, R. B., Ritter, M. K., Doebley, J. F., ENrico Pe, M., & Schmidt, R. J. (2004). The role of barren stalk1 in the architecture of maize. *Nature, 432,* 630–635. https://doi.org/10.1038/nature03148.

Gebauer, J., El-Siddig, K., & Ebert, G. (2002). Baobab (*Adansonia digitata* L.): a review on a multipurpose tree with promising future in Sudan. *Gartenbauwissenschaft, 67,* 155-160. [https://doi.org/](https://doi.org/10.1186/s12870-019-1775-1)[10.1016/S2221-1691(15)30174-X](https://www.researchgate.net/deref/http%3A%2F%2Fdx.doi.org%2F10.1016%2FS2221-1691(15)30174-X).

Genger, R. K., Williams, K. J., Raman, H., Read, B. J., Wallwork, H., Burdon, J. J., & Brown, A. H. D. (2003). Leaf scald resistance genes in Hordeum vulgare and Hordeum vulgare ssp. spontaneum: parallels between cultivated and wild barley. *Australian Journal of Agricultural Research, 54,* 1335-1342. https://doi.org/10.1071/AR02230.

Glew, R. H., Laabes, E. P., Presley, J. M., Schulze, J., Andrews, R., Wang, Y., Chang, Y., & Chuang, L. (2013). Fatty acid, amino acid, mineral and antioxidant contents of acha (*Digitaria exilis*) grown on the Jos Plateau, Nigeria. *International Journal of Nutrition and Metabolism, 5,* 1–8. [https://doi.org/](https://doi.org/10.1093/nutrit/nuz038)[10.5897/IJNAM13.0137](https://dx.doi.org/10.5897%2FIJNAM13.0137).

Glew, R. S., VanderJagt, D. J., Huang, Y.-S., Chuang, L.-T., Bosse, R., & Glew, R. H. (2004). Nutritional analysis of the edible pit of *Sclerocarya birrea* in the Republic of Niger (daniya, Hausa). *Journal of Food Composition and Analysis, 17,* 99–111*.* [https://doi.org/](https://doi.org/10.1186/s12870-019-1775-1)10.1016/s0889-1575(03)00101-7.

Gross, R., Koch, F., Malaga, I., de Miranda, A., Schöneberger, H., & Trugo, L. (1989). Chemical composition and protein quality of some local Andean food sources. *Food Chemistry,* *34,* 25–34. [https://doi.org](https://doi.org/10.1006/jfca.1996.0515)/[10.1016/0308-8146(89)90030–7](https://doi.org/10.1016/0308-8146(89)90030-7).

Grubben, G. J. H., & Denton, O. A. (2004). *Plant resources of tropical African vegetables.* Wageningen; Backhuys Leiden (CTA).

Guil-Guerrero, J. L., Delgado, A. D., Gonzalez, M. C. M., & Isasa, M. E. T. (2004). Fatty acids and carotenes in some ber (*Ziziphus jujuba* Mill.) varieties. *Plant Food for Human Nutrition, 59,* 23−27. [https://doi.org/](https://doi.org/10.1080/87559129.2012.660716)10.1007/s11130-004-0017-2.

[Gulisano](https://www.ncbi.nlm.nih.gov/pubmed/?term=Gulisano%20A%5BAuthor%5D&cauthor=true&cauthor_uid=31737013), A., [Alves](https://www.ncbi.nlm.nih.gov/pubmed/?term=Alves%20S%5BAuthor%5D&cauthor=true&cauthor_uid=31737013), S., [Martins](https://www.ncbi.nlm.nih.gov/pubmed/?term=Martins%20JN%5BAuthor%5D&cauthor=true&cauthor_uid=31737013), J. N., & [Trindade](https://www.ncbi.nlm.nih.gov/pubmed/?term=Trindade%20LM%5BAuthor%5D&cauthor=true&cauthor_uid=31737013), L. M. (2019). Genetics and Breeding of *Lupinus mutabilis*: An Emerging Protein Crop. [*Frontiers in Plant Sci*](https://www.ncbi.nlm.nih.gov/pmc/articles/PMC6831545/)ence, *10,* 1-13. [https://doi.org/](https://doi.org/10.1023/A:1008119107738)10.3389/fpls.2019.01385.

Habou, R., Maârouhi, I. M., Yacoubou, B., Abdoulaye, D., Boubacar, M. M., Ali, M., Sani, I. S., Mahamane, S., & Lykke, A. M. (2014). Population structure of Boscia senegalensis following the toposequence in the commune of Simiri (Niger). *Journal of Animal and Plant Sciences, 23,* 3657-3669.

Han, J. J., & Martienssen, R. (2012).  Pod corn is caused by rearrangement at the Tunicate1 locus. *Plant Cell,* *24,* 2733–2744. https://doi.org/[10.1105/tpc.112.100537](https://dx.doi.org/10.1105%2Ftpc.112.100537).

Han, H., Yang, C., Zhu, J., Zhang, L., Bai, Y., Li, E., & Gilbert, R.G. (2019). Competition between Granule Bound Starch Synthase and Starch Branching Enzyme in starch biosynthesis. *Rice* 12, 96.. https://doi.org/10.1186/s12284-019-0353-3.

Herrero, E., Kolmos, E., Bujdoso, N., Yuan, Y., Wang, M., Berns, M. C., Uhlworm, H., Coupland, G., Saini, R., Jaskolski, M., Webb, A., Goncalves, A., & Davis, S. J. (2012). *EARLY FLOWERING4 recruitment of EARLY FLOWERING3 in the nucleus sustains the Arabidopsis circadian clock. The plant cell online, 24,* 428–443*.* https://10.1105/tpc.111.093807

Hidalgo, A., & Brandolini, A. (2013). Nutritional properties of einkorn wheat *(Triticum monococcum* L.). *Journal of the Science of Food and Agriculture, 94,* 56-64.  <https://doi.org/10.1002/jsfa.6382>.

Hittalmani, S., Mahesh, H. B., Shirke, M. D., Biradar, H., Uday, G., Aruna, Y. R., Lohithaswa, H. C., & Mohanrao, A. (2017). Genome and transcriptome sequence of Finger millet (*Eleusine coracana* (L.) Gaertn.) provides insights into drought tolerance and nutraceutical properties. *BMC Genomics, 18,* 1-16. <https://doi.org/10.1186/s12864-017-3850-z>.

Hubbard, L., McSteenm P., Doebleym J., & Hakem S. (2002). Expression patterns and mutant phenotype of *teosinte branched1* correlate with growth suppression in maize and teosinte. *Genetics*, *162,* 1927–1935.

Hulbert, S. H., Richter, T. E., Axtell, J. D., & Bennetzen, J. L. (1990). Genetic mapping and characterization of sorghum and related crops by means of maize DNA probes. *Proceedings of the National Academy of Sciences*, *87*, 4251-4255.  <https://doi.org/10.1073/pnas.87.11.4251>.

Islam, M. M. (2013). Biochemistry, medicinal and food values of jute (*Corchorus capsularis* L. and *C. olitorius* L.) leaf: a review. *International Journal of Enhanced Research in Science Technology and Engineering*, *2*, 135-44.

Istifanus, M. F., & Agbo, E. B. (2016). Nutritional and health benefits of Acha (*Digitaria exilis*) in the human diet–A review. *Nigerian Food Journal,* *34*,72-78.

Iwata, H., Gaston, A., Remay, A., Thouroude T., Jeauffre, J., Kawamura, K., Oyant, L. H. S., Araki, T., Denoyes, B., & Foucher, F. (2012). The *TFL1* homologue *KSN* is a regulator of continuous flowering in rose and strawberry. *Plant Journal,* *69,* 116-125. <https://doi.org/10.1111/j.1365-313X.2011.04776.x>.

James, M.G. (1995). *Characterization of the Maize gene sugary1, a determinant of starch composition in Kernels. The plant cell online, 7,* 417–429*.* [https://doi.org/](https://doi.org/10.1111/j.1365-313X.2011.04776.x)10.1105/tpc.7.4.417.

Jaffe, W. G., & Korte, R. (1976). Nutritional characteristics of the winged bean in rats. *Nutrition Reports International,* *4,* 449–455.

Jayakumar, K., & Muthuraman, B. (2018). Traditional uses and nutrient status of Indian native plant fruit (*Carissa carandas* Linn.). *World Scientific News,* *96,* 217-224.

Jimenez, M. E., Sammán, N. (2014). Caracterización Química y Cuantificación de Fructooligosacáridos, Compuestos Fenólicos y Actividad Antirradical de Tubérculos y Raíces Andinos cultivados en el Norte de Argentina, Archivos *Latinoamericanos de Nutricion,*  *64,* 131–138.

Jukanti, A. K., Gowda, C. L. L., Rai, K. N., Manga, V. K., & Bhatt, R. K. (2016). Crops that feed the world 11. Pearl Millet (*Pennisetum glaucum* L.): an important source of food security, nutrition and health in the arid and semi-arid tropics. *Food Security*, *8,* 1-23. <https://doi.org/10.1007/s12571-016-0557-y>.

Kalinova, J. (2007). Nutritionally important components of Proso millet (*Panicum miliaceum* L.). *Global Science Books*, *1,* 91-100.

Kalinova, J., & Moundry, J. (2006). Content and Quality of Protein in Proso Millet (*Panicum miliaceum* L.) Varieties. *Plant Foods for Human Nutrition, 61,* 45-49. http://dx.doi.org/10.1007/s11130-006-0013-9.

Kaushal, P., Kumar, V., & Sharma, H. K. (2015). Utilization of taro (*Colocasia esculenta*): a review. *Journal of Food Science and Technology,* *52,* 27-40. [https://doi.org/](https://doi.org/10.3390/su12083493)[10.1007/s13197-013-0933-y](https://www.researchgate.net/deref/http%3A%2F%2Fdx.doi.org%2F10.1007%2Fs13197-013-0933-y).

Khan, R. S., Asghar, W., Khalid, N., Nazir, W., Farooq, M., Ahmed, I., & Syed, Q. A. (2019). Phalsa (*Grewia asiatica* L.) fruit berry a promising functional food ingredient: A comprehensive review. *Journal of Berry Research, 1–15.* [https://doi.org/](https://doi.org/10.1186/s12870-019-1775-1)10.3233/jbr-180332

Kim, T. R., Pastuszyn, A., Vanderjagt, D. J., Glew, R. S., Millson, M., & Glew, R. H. (1997). The nutritional composition of seeds from *Boscia senegalensis* (dilo) from the Republic of Niger. *Journal of Food Composition and Analysis,* *10,* 73-81. <https://doi.org/10.1006/jfca.1996.0515>.

Kohajdova, Z., & Karovicova, J. (2008). Nutritional Value and Baking Applications of Spelt Wheat. *Acta Scientiarum Polonorum Technologia Alimentaria*, *7,* 5-14.

Komatsuda, T., Pourkheirandish, M., He, C., Azhaguvel, P., Kanamori, H., Perovic, D., Stein, N., Graner, A., Wicker, T., Tagiri, A., & Lundqvist, U. (2007). Six-rowed barley originated from a mutation in a homeodomain-leucine zipper I-class homeobox gene. *Proceedings of the National Academy of Sciences*, *104*, 1424-1429. <https://doi.org/10.1073/pnas.0608580104>.

Konishi, S., Izawa, T., Lin, S. Y., Ebana, K., Fukuta, Y., Sasaki, T., & Yano, M. (2006). An SNP caused loss of seed shattering during rice domestication. *Science, 312,* 1392–1396. https://doi.org/10.1126/science.1126410.

Konishi, S., Izawa, T., Lin, S. Y., Ebana, K., Fukuta, Y., Sasaki, T., & Yano, M. (2006). An SNP caused loss of seed shattering during rice domestication. *Science, 312,* 1392–1396. https://doi.org/10.1126/science.1126410.

Koskela E. A., Mouhu K., Albani M. C., Kurokura T., Rantanen M.,  Sargent D. J., Battey N. H., Coupland G., Elomaa P., & Hytönen T. (2012). Mutation in *TERMINAL FLOWER1* reverses the photoperiodic requirement for flowering in the wild strawberry *Fragaria vesca*. *Plant Physiology,* *159,* 1043-1054. <https://doi.org/10.1104/pp.112.196659>.

Kubmarawa, D., Magomya, A. M., Yebpella, G. G., & Adedayo, S. A. (2011). Nutrient content and amino acid composition of the leaves of *Cassia tora* and *Celtis integrifolia*. *International Research Journal of Biochemistry & Bioinformatics, 1,* 222-225.

Kumar, U. D. J., Saraswathy, R., & Rama Das, V. S. (1984). Differential performance of Cleome gynandra L. (C4) and Cleome speciosa L. (C3) under water stress and recovery. *Environmental and Experimental Botany, 24,* 305-310.

Lachman, J., Fernández, E. C., & Orsák, M. (2003). Yacon (*Smallanthus sonchifolia* (Poepp. et Endl.) H. Robinson] chemical composition and use-a review. *Plant Doil and Environment,* *49,* 283-290. [https://doi.org](https://doi.org/10.1006/jfca.1996.0515)/[10.17221/4126-PSE](https://www.researchgate.net/deref/http%3A%2F%2Fdx.doi.org%2F10.17221%2F4126-PSE).

Lee, J., Park, J. J., Kim, S. L., Yim, J., & An, G. (2007). *Mutations in the rice liguleless gene result in a complete loss of the auricle, ligule, and laminar joint. Plant Molecular Biology, 65,* 487–499*.* [https://doi.org/](https://doi.org/10.1105/tpc.105.038430)10.1007/s11103-007-9196-1.

Lemmon, Z. H., Reem, N. T., Dalrymple, J., Soyk, S., Swartwood, K. E., Rodriguez-Leal, D., Van Eck, J., & Lippman, Z. B. (2018). Rapid improvement of domestication traits in an orphan crop by genome editing. *Nature Plants, 4,* 766–770. <https://doi.org/10.1038/s41477-018-0259-x>.

Leone, A., Spada, A., Battezzati, A., Schiraldi, A., Aristil, J., & Bertoli, S. (2015). Cultivation, genetic, ethnopharmacology, phytochemistry and pharmacology of M*oringa oleifera* leaves: An overview. *International Journal of Molecular Sciences, 16,* 12791–12835*.* [https://doi.org/](https://doi.org/10.1186/s12870-019-1775-1)10.3390/ijms160612791.

Lepcha, P., Egan, A. N., Doyle, J. J., & Sathyanarayana, N. (2017). A review on current status and future prospects of winged bean (*Psophocarpus tetragonolobus*) in tropical agriculture. *Plant Foods for Human Nutrition,* *72,* 225-235. [https://doi.org](https://doi.org/10.1006/jfca.1996.0515)/10.1007/s11130-017-0627-0.

Lepcha, P., Kumar, P. R., & Sathyanarayana, N. (2019). Exploring genomics research in the context of some underutilized legumes—A review. R. [Banerjee,](https://www.wiley.com/en-us/search?pq=%7Crelevance%7Cauthor%3ARintu+++Banerjee) [G. V. Kumar.](https://www.wiley.com/en-us/search?pq=%7Crelevance%7Cauthor%3AGarlapati+Vijay++Kumar) & [S. P. J. Kumar (Eds)](https://www.wiley.com/en-us/search?pq=%7Crelevance%7Cauthor%3AS.P.+Jeevan+Kumar), *OMICS‐Based Approaches in Plant Biotechnology* (pp. 1-18). Scrivener publishing.

Li, B., Sun, S., Gao, X., Wu, M., Deng, Y., Zhang, Q., Li, X., Xiao, J., Ke, Y., & Wang, S. (2019). Overexpression of a “fruit-weight 2.2-like” gene OsFWL5 improves rice resistance. *Rice*, *12,* 1-6. https://doi.org/10.1186/s12284-019-0315-9.

Li, C., Zhou, A., & Sang, T. (2006). Rice domestication by reducing shattering. *Science, 311,* 1936–1939. <https://doi.org/10.1126/science.1123604>.

Li, J., Fan, L., Ding, S., & Ding, X. (2007). Nutritional composition of five cultivars of Chinese jujube. *Food Chemistry, 103,* 454−460. [https://doi.org/](https://doi.org/10.1080/87559129.2012.660716)[10.1016/j.foodchem.2006.08.016](https://www.researchgate.net/deref/http%3A%2F%2Fdx.doi.org%2F10.1016%2Fj.foodchem.2006.08.016).

Li, Y., & Xu, M. (2017). *CCT family genes in cereal crops: A current overview. The Crop Journal, 5,* 449–458. https://doi.org/10.1016/j.cj.2017.07.001.

Lim, T. K. (2012). *Edible Medicinal And Non-Medicinal Plants*.  Springer.

Lim, T. K. (2014). *Arracacia xanthorrhiza. Edible Medicinal and Non Medicinal Plants, 9,* 361–366*.* <https://doi.org/10.1007/978-94-017-9511-1_7>.

Lim, T. K. (2015). *Pastinaca sativa*. In T. K. Lim (Ed.),  *Edible Medicinal and Non Medicinal Plants,* (pp. 417-428). Springer, Dordrecht.

Lin, Z,, Griffith, M. E., Li, X., Zhu, Z., Tan, L., Fu, Y., Zhang, W., Wang, X., Xie, D., & Sun, C. (2007). Origin of seed shattering in rice (*Oryza sativa* L.). *Planta, 226,* 11–20. https://doi.org/10.1007/s00425-006-0460-4.

Luo, Y., Reid, R., Freese, D., Li, C., Watkins, J., Shi, H., Zhang, H., Lorraine, A., & Song, B. H. (2017). Salt tolerance response revealed by RNA-Seq in a diploid halophytic wild relative of sweet potato. *Scientific Reports, 7*, 1-13. <https://doi.org/10.1038/s41598-017-09241-x>.

Lusepani, N. E. (1999). Reproductive biology and utilisation of *Berchemia discolor (Klotzsch)* Hemsle*y (Rhamnaceae)*. Doctoral dissertation, Stellenbosch: Stellenbosch University.

Maass, B. L., Knox, M. R., Venkatesha, S. C., Angessa, T. T., Ramme, S., & Pengelly, B. C. (2010). *Lablab purpureu*s—A crop lost for Africa?. *Tropical Plant Biology, 3,* 123-135. <https://doi.org/10.1007/s12042-010-9046-1>.

Manikandan, S., Lakshmanan, G.M.A., Chandran, C. (2016). Phytochemical screening and evaluation of tuber extract of *Plectranthus rotundifolius* Spreng. By GC-MS and FT-IR spectrum analysis. *International Journal of Herbal Medicine*, *4,* 36-40.

Mariod, A. A., & Abdelwahab, S. I. (2012). *Sclerocarya birrea* (Marula), an African tree of nutritional and medicinal uses: a review. *Food Reviews International,* *28,* 375-388. <https://doi.org/10.1080/87559129.2012.660716>.

Maundu, P.vM., Ngugi, G. W. and Kabuye, C. H. (1999). Traditional food plants of Kenya. KENRIK, National Museums of Kenya.

Meghwal, P. R., & Singh, A., (2015). *Lasoda or Gonda (Cordia myxa L.).* Jaya Publishing House New Delhi.

Mérida, A., Rodrı́guez-Galán, J. M., Vincent, C., & Romero, J.M. (1999). *Expression of the Granule-Bound Starch Synthase I (Waxy) gene from snapdragon is developmentally and circadian clock regulated. Plant Physiology, 120,* 401–410*.* [https://doi.org/](https://doi.org/10.1038/nrg3605)10.1104/pp.120.2.401.

Meyer, R. S., & Purugganan, M. D. (2013). Evolution of crop species: genetics of domestication and diversification. *Nature Reviews Genetics, 14, 840–852.* <https://doi.org/10.1038/nrg3605>.

Miller, C.vD. (1971) Food values of Poi, Taro, and Limu. *Bernice P. Bishop Museum Honolulu Bulletin*, *37,* 1–25.

Mishra, S. S., Moharana, S. K., & Dash, M. R. (2011). Review on *Cleome gynandr*a. *International Journal of Research in Pharmacy and Chemistry*, *1*, 681-689.

Misra, P. S., Misra, G., Prakash, D., Tripathi, R. D., Chaudhary, A. R., & Mishra, P. N. (1987). Assay of some nutritional and anti-nutritional factors in different cultivars of winged bean *Psophocarpus tetragonolobus* (L.) DC. seeds. *Plant Foods for Human Nutrition,* *36,* 367–337. <https://doi.org/10.1155/2019/3075208>.

Mohan, V. R., & Janardhanan, K., (1994). The biochemical and nutrient assessment of less known pulses of the genus Canavalia. *International Journal of Food Science and Nutrition,* *45,* 255–262.

Mueller, L. A., Tanksley, S. D., Giovannoni, J. J., Van Eck, J., Stack, S., Choi, D., Kim, B. D., Chen, M., Cheng, Z., Li, C., & Ling, H. (2005). The tomato sequencing project, the first cornerstone of the International Solanaceae Project (SOL). *Comparative and Functional Genomics, 6,* 153-158. [https://doi.org/](https://doi.org/10.1073/pnas.87.11.4251)[10.1002/cfg.468](https://doi.org/10.1002/cfg.468).

Muhammad, I., Zhao, J., Dunbar, D.C., & Khan, J.A. (2002). Constituents of *Lepidium meyenii* 'maca'. *Phytochemistry*, *59,* 105-110. [https://doi.org/](https://doi.org/10.1016/j.foodchem.2005.02.033)[10.1016/s0031-9422(01)00395-8](https://doi.org/10.1016/s0031-9422(01)00395-8).

Murevanhema, Y. Y., & Jideani, V. A. (2013). Potential of bambara groundnut (*Vigna subterranea* (L.) Verdc) milk as a probiotic beverage—a review. *Critical reviews in Food Science and Nutrition,* *53,* 954-967. [https://doi.org/](https://doi.org/10.1080/87559128909540843)[10.1080/10408398.2011.574803](https://doi.org/10.1080/10408398.2011.574803).

Naeem, M., Shabbir, A., Ansari, A. A., Aftab, T., Khan, M. M. A., & Uddin, M. (2020). Hyacinth bean (*Lablab purpureus* L.)–An underutilised crop with future potential. *Scientia Horticulturae*, *272*, 1-12. <https://doi.org/10.1016/j.scienta.2020.109551>.

Narasimham, P. (1990). Breadfruit and Jackfruit. In S. Nagy, P. E. Shawi, W. Wardowski (Eds.), *Fruits of tropical and subtropical origin: composition, Properties and uses*, (pp. 193-259). Florida Science Source Inc.

Nelson, S. C. (2003). Species profiles for pacific island agroforestry.  Permanent Agriculture Resources.

Newman, Y., Jennings, E. D., Vendramini, J., & Blount, A. (2010). Pearl millet (*Pennisetum glaucum*): Overview and management. *SSAGR-337, one of a series of the Agronomy Department, Florida Cooperative Extension Service, Institute of Food and Agricultural Sciences, University of Florida*.

Ngadze, R, T., Linnemann, A. R., Nyanga, L. K., Fogliano, V., Verkerk, R., (2017). Local processing and nutritional composition of indigenous fruits: The case of monkey orange (*Strychnos* spp.) from Southern Africa. *Food Reviews International, 33,* 123–142. [https://doi.org/](https://doi.org/10.1016/j.foodchem.2005.02.033)10.1080/87559129.2016.1149862.

Nohara, S., & Kimura, M. (1997). Growth characteristics of Nelumbo nucifera Gaertn. in response to water depth and flooding. *Ecological Research*, *12*, 11-20. <https://doi.org/10.1007/BF02523605>.

Nouri, A., Etminan, A., Teixeira da Silva, J. A., & Mohammadi, R. (2011). Assessment of yield, yield-related traits and drought tolerance of durum wheat genotypes (*Triticum turgidum* var. durum Desf.). *Australian Journal of Crop Science*, *5*, 8-16.

Nuga, O. O., & Ofodile, E. A. U. (2010). Potentials of *Treculia africana* Decne–an endangered species of Southern Nigeria. *Journal of Agriculture and Social Research,*  *10,* 91-99. [https://doi.org/](https://doi.org/10.1186/s12870-019-1775-1)[10.4314/jasr.v10i2.67577](https://doi.org/10.4314/jasr.v10i2.67577).

Nyman, L.P., Gonzales, C.J., & Arditti, J. (1983). In-vitro selection for salt tolerance of taro (*Colocasia esculenta* var *antiquorum*). *Annals of Botany*, *51*, 229-236. <https://doi.org/10.1093/oxfordjournals.aob.a086461>.

Ojansivu, I., Ferreira, C. L., & Salminena, S. (2011). Yacon- New source of prebiotic oligosaccharides with a history of safe use. *Trends Food Science and Technology, 22*, 40–46.

Okafor, J. C., & Okolo, H. C. (1974). *Potentials and some indigenous fruit trees of Nigeria.* Paper Presented to the 5th Annual Conference of the Forestry Association of Nigeria, Jos.

Okoli, B. E., & Mgbeogu, C.M. (1983). Fluted pumpkin, *Telfairia occidentalis:* West African vegetable crop*. Economic Botany, 37*, 145–149*.* [https://doi.org/](https://doi.org/10.1093/nutrit/nuz038)10.1007/bf02858775.

Oliveira, J. T., Vasconcelos, I., Bezerra, L. C. N., Silveira, S., Monteiro, A. C., & Moreira, R., (2000). Composition and nutritional properties of seeds from *Pachira aquatica* Aubl*, Sterculia striata* St Hil et Naud *and Terminalia catappa* Linn. *Food Chemistry, 70,* 185–191*.* [https://doi.org/](https://doi.org/10.1016/j.foodchem.2005.02.033)10.1016/s0308-8146(00)00076-5.

Omoikhoje, S. O. (2008). “Assessment of the nutritive value of bambara groundnut as influenced by cooking time”. In *Livestock Research for Rural Development.* Available from <http://www.1rrd.org/1rrd20/4/omoi20055.htm>. Accessed August 31, 2020.

Onyango, C. A., Ochanda, S. O., Mwasaru, M. A., Ochieng, J. K., Mathooko, F. M., & Kinyuru, J. N. (2013). Effects of malting and fermentation on antiNutrient reduction and protein digestibility of Red Sorghum, White Sorghum and Pearl Millet, *Journal of Food Research, 2,* [https://doi.org/](https://doi.org/10.1016/j.foodchem.2005.02.033)[10.5539/jfr.v2n1p41](https://doi.org/10.5539/jfr.v2n1p41).

Orwa, C., Mutua, A., Kindt, R., Jamnadass, R., & Anthony, S. (2009). *Punica granatum*.  Agroforestree Database*.* <http://apps.worldagroforestry.org/treedb/AFTPDFS/Punica_granatum.PDF>.

Orwa, C., Mutua, A., Kindt, R., Jamnadass, R., & Anthony, S., (2009). *Strychnos cocculoides*. Agroforestree Database. <http://apps.worldagroforestry.org/treedb/AFTPDFS/Strychnos_cocculoides.PDF>.

Paterson, A.H.,  Lander. E. S., Hewitt, J. D., Peterson, S., Lincoln, S. E., & Tanksley, S. D. (1988). *Nature, 335*, 721–726.  https://doi.org/10.1038/335721a0.

Peres, N. D. S. L., Bortoluzzi, L. C. P., Marques, L. L. M., Formigoni, M., Fuchs, R. H. B., Droval, A. A., & Cardoso, F. A. R. (2020). Medicinal effects of Peruvian maca (*Lepidium meyenii*): a review. *Food & Function*, *11*,  83-92. [https://doi.org/](https://doi.org/10.1590/S1806-66902010000200011)10.1039/c9fo02732g.

Péros, J.P., Launay, A., Berger, G., Lacombe, T., & This, P. (2015). MybA1 gene diversity across the *Vitis* genus. *Genetica*, *143*, 373-384. <https://doi.org/10.1007/s10709-015-9836-3>.

Popoola, J.,  Ojuederie, O., Omonhinmin, C., & Adegbite, A. (2019). Neglected and underutilized legume crops: Improvement and future prospects. In F. Shah (Ed.), [*Recent Advances in Grain Crops Research*](https://www.intechopen.com/books/recent-advances-in-grain-crops-research). InTechOpen publication.

Prazak, R. (2001). Salt tolerance of *Triticum monococcum* L., *T. dicoccum* (Schrank) Schubl., *T. durum* Desf. and *T. aestivum* L. seedlings. *Journal of applied genetics*, *42*, 289-292.

Priya, M. H., & Anbuselvi, S. (2013). Physico chemical analysis of *Plectranthus rotundifolius*. *Journal of Chemical and Pharmaceutical Research,* *5,* 12-14.

Putterill, J., Robson, F., Lee, K., Simon, R., & Coupland, G. (1995). The *CONSTANS* gene of *Arabidopsis* promotes flowering and encodes a protein showing similarities to zinc finger transcription factors. *Cell, 80,* 847–857. <https://doi.org/10.1016/0092-8674(95)90288-0>.

Rai, S., While, A., Mukherjee, K., Saha, B. P., Mukherjee, P. K. (2006). Antioxidant activity of *Nelumbo nucifera* (sacred lotus) seeds. *Journal of Ethnopharmacology,* *104,* 322-327. [https://doi.org/](https://doi.org/10.1016/j.foodchem.2005.02.033)10.1016/j.jep.2005.09.025.

Ramsay, L., Comadran, J., Druka, A., Marshall, D. F., Thomas, W. T., Macaulay, M., MacKenzie, K., Simpson, C., Fuller, J., Bonar, N., & Hayes, P. M. (2011). INTERMEDIUM-C, a modifier of lateral spikelet fertility in barley, is an ortholog of the maize domestication gene TEOSINTE BRANCHED 1. *Nature Genetics*, *43*, 169-172. <https://doi.org/10.1038/ng.745>.

Ranasinghe, R. A. S. N., Maduwanthi, S. D. T., & Marapana, R. A. U. T. (2018). Nutritional and health benefits of Jackfruit: A review. *International Journal of Food Science*, *2019,*  1-13. h[ttps://doi.org/10.1155/2019/4327183](https://doi.org/10.1155/2019/4327183).

Ranasinghe, R. A. S. N., Maduwanthi, S. D. T., & Marapana, R. A. U. J. (2019). Nutritional and health benefits of jackfruit (*Artocarpus heterophyllus* Lam.): A review. *International Journal of Food Science*, *2019*, 1-13. <https://doi.org/10.1155/2019/4327183>.

Rao, A. P., & Rajendrudu, G. (1989). Net photosynthetic rate in relation to leaf anatomical characteristics of c-3, c-3-c-4 and c-4 dicotyledons. *Proceedings of Indian Academy of Sciences Plant Science,* *99*, 529-538.

Ratnayake, S. S., [Kumar](https://sciprofiles.com/profile/80599), L., & [Kariyawasam](https://sciprofiles.com/profile/608713), C, S. (2020). Neglected and underutilized fruit species in Sri Lanka: prioritisation and understanding the potential distribution under climate change. *Agronomy*, *10*, 1-19. [https://doi.org/](https://doi.org/10.1016/j.foodchem.2005.02.033)[10.3](https://doi.org/10.3390/agronomy10010034)390/agronomy10010034.

Repo-Carrasco-Valencia, R., de La Cruz, A. A., Alvarez, J. C. I., & Kallio, H. (2009). Chemical and functional characterization of kaniwa (*Chenopodium pallidicaule*) grain, extrudate and bran. *Plant Foods for Human Nutrition, 64,* 94-101. <https://doi.org/10.1007/s11130-009-0109-0>.

Rodrigues, A. P., Pereira, G. A., Tomé, P. H. F., Arruda, H. S., Eberlin, M. N., & Pastore, G. M., (2019). Chemical composition and antioxidant activity of monguba (*Pachira aquatica*) seeds*. Food Research International, 121,* 880-887. [https://doi.org/](https://doi.org/10.1016/j.foodchem.2005.02.033)10.1016/j.foodres.2019.01.014.

Rodrigues, B. M., Souza, B. D. Nogueira, R. M., & Santos, M. G. (2010). Tolerance to water deficit in young trees of jackfruit and sugar apple. *Revista Ciência Agronômica*, *41*, 245-252. <https://doi.org/10.1590/S1806-66902010000200011>.

Rodríguez, G. R., Muños, S., Anderson, C., Sim S. C., Michel, A., Causse, M., Gardener, B. B. M., Francis, D., van der Knaap, E. (2011). Distribution of SUN, OVATE, LC and FAS in the tomato germplasm and the relationship to fruit shape diversity. *Plant Physiology, 156,* 275-285.  [https://doi.org/](https://doi.org/10.1104/pp.111.181065)10.1104/pp.110.167577.

Rossetto, M., Jackes, B. R., Scott, K. D., & Henry, R. J. (2001). Intergeneric relationships in the Australian Vitaceae: new evidence from cpDNA analysis. *Genetic Resources and Crop Evolution*, *48*, 307-314. <https://doi.org/10.1023/A:1011225319360>.

Ruibal-Mendieta, N. L., Delacroix, D. L., Mignolet, E., Pycke, J. M., Marques, C., Rozenberg, R., Petitjean, G., Habib-Jiwan, J. L., & Meurens, M. (2005). Spelt (*Triticum aestivum* ssp. *spelta*) as a source of breadmaking flours and bran naturally enriched in oleic acid and minerals but not phytic acid. *Journal of Agricultural and Food Chemistry*, *53,* 2751–275. [https://doi.org/](https://doi.org/10.1002/jsfa.6382)[10.1021/jf048506e](https://doi.org/10.1021/jf048506e).

Rzedowski, J. (1963). The northern limit of tropical rain forests in continental North America. *Vegetation*, *11,* 173-198.

Sade, F. Q. (2009). Proximate, antinutritional factors and functional properties of processed pearl millet (*Pennisetum Glaucum*). *Journal of Food Technology,* *7,* 92-97.

Schnyder, H., Seo, S., Rademacher, I. F., & Khbauch, W. (1990). Spatial distribution of growth rates and of epidermal cell lengths in the elongation zone during leaf development in *Lolium perenne* L. *Planta, 181*, 423-431. [https://doi.org/](https://doi.org/10.1038/nrg1729)10.1007/BF00195897.

Sethuraman, G., Nizar, N. M. M., Muhamad, F. N., Suhairi, T. A. S. T. M., Jahanshiri, E., Gregory, P. J., & Azam-Ali, S. Nutritional Composition of Black Potato (*Plectranthus rotundifolius* (Poir.) Spreng.). [*International Journal of Scientific and Engineering Research*](https://www.researchgate.net/journal/International-Journal-of-Scientific-and-Engineering-Research-2229-5518)*, 11,* 1145-1150.

Seung, D. (2020), *Amylose in starch: towards an understanding of biosynthesis, structure and function. New Phytologist, 228,* 1490-1504. <https://doi.org/10.1111/nph.16858>.

Shad, M. A., Nawaz, H., Siddique, F., Zahra, J., & Mushtaq, A. (2013). Nutritional and functional characterization of seed kernel of lotus (*Nelumbo nucifera*): application of response surface methodology. *Food Science and Technology Research*, *19*, 163-172.

Shen, R., Yang, S., Zhao, G., Shen, Q., & Diao, X. (2015). Identification of carotenoids in foxtail millet (*Setaria italica*) and the effects of cooking methods on carotenoid content. *Journal of Cereal Science, 61, 86–93.*[https://doi.org/](https://doi.org/10.1016/j.scienta.2020.109551)10.1016/j.jcs.2014.10.009.

Shukla, S. K., Kumar, A., Terrence, M., Yusuf, J., Singh, V. P., & Mishra, M. (2013). The probable medicinal usage of *Cassia tora:* an overview.  *Journal of Biological Science,* *13,* 13-17. [https://doi.org/](https://doi.org/10.1186/s12870-019-1775-1)10.3844/ojbssp.2013.13.17.

Sididbe, M., Scheuring, J. F., Kone, M., Hofman, P., & Frigg, M. (1998). More on baobab’s homegrown vitamin C: Some trees have more than others – consistently. *Agroforestry* *Today,* *10,* 7-9.

Singh, A., & Uppal, G. K. (2015). A Review on *Carissa Caranda*s- Phytochemistry, Ethno- pharmacology. And Micropropagation as Conservation Strategy. *Asian Journal of Pharmaceutical and Clinical Research*, *8,* 26-30.

Singh, A., Sharma, P. C., Kumar, A., Meena, M.D., & Sharma, D. K. (2018). Genotypic differences for salt tolerance in bael (*Aegle marmelos*) cultivars. [*Indian Journal of Agricultural Sciences*](https://www.researchgate.net/journal/Indian-Journal-of-Agricultural-Sciences-0019-5022)*, 88*, 435-441.0

Smartt, J. (1990). 5. Vavilov's Law of Homologous Series and de novo crop plant domestication. *Biological Journal of the Linnean Society*, *39*, 27-38. <https://doi.org/10.1111/j.1095-8312.1990.tb01610.x>.

Soundararajan, P., Won, S. Y., & Kim, J. S. (2019). Insight on Rosaceae family with genome sequencing and functional genomics perspective. *BioMed research International*, *2019*, 1-12. <https://doi.org/10.1155/2019/7519687>.

Spielmeyer, W., Ellis, M. H., & Chandler, P. M. (2002). Semidwarf (sd-1), "green revolution" rice, contains a defective gibberellin 20-oxidase gene. *Proceedings of the National Academy of Sciences of the United States of America*, *99*, 9043–9048. <https://doi.org/10.1073/pnas.132266399>.

Stadlmayr, B., Charrondière, U. R., Eisenwagen, S., Jamnadass, R., & Kehlenbeck, K. (2012). Nutrient composition of selected indigenous fruits from sub-Saharan Africa*. Journal of the Science of Food and Agriculture, 93,* 2627-2636.  [https://doi.org/](https://doi.org/10.1186/s12870-019-1775-1)10.1002/jsfa.6196.

Sweeney, M. T., Thomson, M. J., Pfeil, B. E., & McCouch, S. (2006). Caught red-handed: Rc encodes a basic helix-loop-helix protein conditioning red pericarp in rice. *The Plant cell*, *18*, 283–294. <https://doi.org/10.1105/tpc.105.038430>.

Takahashi, Y., & Shimamoto, K. (2011). Heading date 1 (Hd1), an ortholog of *Arabidopsis* CONSTANS, is a possible target of human selection during domestication to diversify flowering times of cultivated rice. *Genes & Genetic Systems, 86,* 175–182*.* <https://doi.org/10.1266/ggs.86.175>.

Takano-Kai, N., Jiang, H., Kubo, T., Sweeney, M., Matsumoto, T., Kanamori, H., Padhukasahasram, B., Bustamante, C., Yoshimura, A., Doi, K., & McCouch, S. (2009). Evolutionary history of GS3, a gene conferring grain length in rice. *Genetics*, *182*, 1323–1334. https://doi.org/10.1534/genetics.109.103002.

Tan, L., Li, X., Liu, F., Sun, X., Li, C., Zhu, Z., Fu, Y., Cai, H., Wang, X., Xie, D., & Sun, C. (2008). Control of a key transition from prostate to erect growth in rice domestication*. Nature Genetics, 40, 1360–1364.* <https://doi.org/10.1038/ng.197>.

Taylor, M. B., & Tuia, V. S. (2007). Breadfruit in the pacific region. *Acta Horticulturae*, *757,* 43-50. <https://doi.org/10.17660/ActaHortic.2007.757.4>.

Temesgen, M., & Retta, N. (2015). Nutritional potential, health and food security benefits of taro *Colocasia esculenta* (L.): A review. *Food Science and Quality Management, 36,* 23-30.

Teow, C. C., Truong, V.-D., McFeeters, R. F., Thompson, R. L., Pecota, K. V., & Yencho, G. C. (2007). Antioxidant activities, phenolic and β-carotene contents of sweet potato genotypes with varying flesh colours. *Food Chemistry, 103,* 829–838. [https://doi.org/](https://doi.org/10.17660/ActaHortic.2007.757.4)10.1016/j.foodchem.2006.09.033.

Thakur, G., Bag, M., Sanodiya, B., Bhadauriya, P., Debnath, M., Prasad, G., & Bisen, P. (2009). *Momordica balsamina:* A medicinal and nutraceutical plant for health care management. *Current Pharmaceutical Biotechnology, 10,* 667–682*.* [https://doi.org/](https://doi.org/10.1186/s12870-019-1775-1)10.2174/138920109789542066.

Tian, Y., Zeng, Y., Zhang, J., Yang, C., Yan, L., Wang, X., Shi, C., Xie, J., Dai, T., Peng, L., Huan, Y. Z., Xu, A., Huang, Y., Ma, X., Dong, Y., Hao, S., & Sheng, J. (2015). High quality reference genome of drumstick tree(*Moringa oleifera* Lam.)*,* a potential perennial crop*. Science China Life Sciences, 58,* 627–638. <https://doi.org/10.1007/s11427-015-4872-x>.

Tian, Y., Zeng, Y., Zhang, J., Yang, C., Yan, L., Wang, X., Shi, C., Xie, J., Dai, T., Peng, L., Huan, Y. Z., Xu, A., Huang, Y., Ma, X., Dong, Y., Hao, S., & Sheng, J. (2015). High quality reference genome of drumstick tree(*Moringa oleifera* Lam.)*,* a potential perennial crop*. Science China Life Sciences, 58,* 627–638. <https://doi.org/10.1007/s11427-015-4872-x>.

Ticona, L. N. A., Pérez, V.T., & Benito, P. B. (2020). Local/traditional uses, secondary metabolites and biological activities of Mashua (*Tropaeolum tuberosum* Ruíz & Pavón). *Journal of Ethnopharmacology,* *247*, 1-19. [https://doi.org](https://doi.org/10.1006/jfca.1996.0515)/10.1016/j.jep.2019.112152.

Tripathi, A. S., Chitra, V., Sheik, N. W., Mohale, D. S., & Dewani, A. P. (2010). Immunomodulatory activity of the methanol extract of *Amorphophallus campanulatus* (Araceae) tuber. *Tropical Journal of Pharmaceutical Research,* *9,* 451- 454. [https://doi.org/](https://doi.org/10.1038/nrg1729)[10.4314/tjpr.v9i5.61055](https://doi.org/10.4314/tjpr.v9i5.61055).

Tukura, B.W.,  Obliva, O. (2015). Proximate and nutritional compositions of Breadfruit (*Artocarpus Altilis*) seeds. *IOSR Journal of Environmental Science*, *9,* 68-73. [https://doi.org/](https://doi.org/10.17660/ActaHortic.2007.757.4)doi:10.9790/2402-09336873.

Tutin, T. G. (1980). Umbellifers of the British Isles. Botanical Society of the British Isles, London.

Udosen, E. O., Udok, U. E., & Unuigbe, O. S. (1999). The comparison of the nutrient compositions of Lasianthera africana and Hejnsia crinita. *Journal of Food Biochemistry,* *23,* 571-576. <https://doi.org/10.1111/j.1745-4514.1999.tb00038.x>.

Vijayvargia, P., & Vijayvergia, R. (2014). A Review on *Limonia acidissima* l.: Multipotential medicinal plant. *International Journal of Pharmaceutical Science Review and Research,* *28,* 191-195.

von Bothmer, R., Jacobsen, N., Baden, C., Jorgensen, R.B., & Linde-Laursen, I. (1995). *An ecogeographical study of the genus Hordeum*. IPGRI.

Wang, H., Nussbaum-Wagler, T., Li, B., Zhao, Q., Vigouroux, Y., Faller, M., Bomblies, K., Lukens, L., & Doebley, J. F. (2005). The origin of the naked grains of maize. *Nature, 436, 714–719.* [https://doi.org/](https://doi.org/10.1111/j.1745-4514.1999.tb00038.x)10.1038/nature03863.

Wang, H., Studer, A. J., Zhao, Q., Meeley, R., & Doebley, J.F. (2015). *Evidence that the origin of naked kernels during maize domestication was caused by a single amino acid substitution in tga1 . Genetics, 200,* 965–974*.* [https://doi.org/](https://doi.org/10.1111/j.1745-4514.1999.tb00038.x)10.1534/genetics.115.175752.

Wang, S., Chang, Y., & Ellis, B. (2016). Overview of OVATE FAMILY PROTEINS, A novel class of plant-Specific growth regulators. *Frontiers in Plant Science*, *7*, 1-8. <https://doi.org/10.3389/fpls.2016.00417>.

Weeden, N. F. (2007). Genetic changes accompanying the domestication of *Pisum sativum*: is there a common genetic basis to the ‘domestication syndrome for legumes?. *Annals of Botany*, *100*, 1017-1025. <https://doi.org/10.1093/aob/mcm122>.

Weng, J., Gu, S., Wan, X., Gao, H., Guo, T., Su, N., Lei, C., Zhang, X., Cheng, Z., Guo, X., Wang, J., Jiang, L., Zai, H., & Wan, J. (2008). Isolation and initial characterization of GW5, a major QTL associated with rice grain width and weight. *Cell Research, 18,* 1199–1209*.* [https://doi.org/](https://doi.org/10.1105/tpc.105.038430)10.1038/cr.2008.307.

White, P., Alvistur, E, Dias, C., Vinas, E., White, H., & Collazos, C. (1955). Nutrient content and protein quality of quinoa and cañihua, edible seed products of the Andes mountains. *Journal of Agricultural and Food Chemistry,* *6,* 531–534. [https://doi.org](https://doi.org/10.1006/jfca.1996.0515)/[10.1021/jf60052a009](https://doi.org/10.1021/jf60052a009).

[Wild Foods Home Garden](https://wildfoodshomegarden.com/) & [Nature's Restaurant](http://natures-restaurant-online.com/)  <https://wildfoodshomegarden.com/Foxtail.html>. Accessed on 21 December 2020.

Wu, S., Xiao, H., Cabrera, A., Meulia, T., & van der Knaap, E. (2011). SUN regulates vegetative and reproductive organ shape by changing cell division patterns. *Plant Physiology*, *157*, 1175–1186. <https://doi.org/10.1104/pp.111.181065>.

Yadav, A. K. (1999). *Phalsa: A potential new small fruit for Georgia*. ASHS Press, Alexandria.

Yang, X. (2011). Study of RAMOSA1 function during maize inflorescence development. Ph. D. Thesisi, L[owa State University](https://lib.dr.iastate.edu/do/search/?q=author_lname%3A%22Yang%22%20author_fname%3A%22Xiang%22&start=0&context=1759512).

Yazzie, D., Vanderjagt, D.J.,  Pastuzyn, A., Okolo, A., & Glew, R. H. (1994). The amino acid and mineral content of baobab (*Adansonia digitata* L.) leaves. *Journal of Food Composition Analysis,* *7,* 189–193. [https://doi.org/](https://doi.org/10.1186/s12870-019-1775-1)[10.9790/2380-0632226](https://www.researchgate.net/deref/http%3A%2F%2Fdx.doi.org%2F10.9790%2F2380-0632226).

Zhang, Y., Gao, X., Li, J., Gong, X., Yang, P., Gao, J., Wang, P., & Feng, B. (2019). Comparative analysis of proso millet (*Panicum miliaceum* L.) leaf transcriptomes for insight into drought tolerance mechanisms. *BMC Plant Biology*, *19*, 1-17. <https://doi.org/10.1186/s12870-019-2001-x>.

Zhu, B. F., Si, L., Wang, Z., Zhou, Y., Zhu, J., Shangguan, Y., Lu, D., Fan, D., Li, C., Lin, H., Qian, Q., Sang, T., Zhou, B., Minobe, Y., & Han, B. (2011). Genetic control of a transition from black to straw-white seed hull in rice domestication. *Plant Physiology*, *155*, 1301–1311. <https://doi.org/10.1104/pp.110.168500>.
